# Supplementary material for: Novel 7-(1H-pyrrol-1-yl)spiro[chromeno[4,3-b]quinoline-6,1′-cycloalkanes]: synthesis, cross-coupling reactions, and photophysical properties
Source: Royal Society of Chemistry journal article supplement (doi:10.1039/d0nj05740a), 2021-01-01
Supplement: d0nj05740a1.pdf [file d0nj05740a1.pdf]

## Supporting Information

### **Novel 7-(1*H*-Pyrrol-1-yl)spiro[chromeno[4,3-*b*]quinoline-6,1'-cycloalkanes]: Synthesis, Cross-Coupling Reactions and Photophysical Properties**

Letícia B. Silva, Felipe S. Stefanello, Sarah C. Feitosa, Clarissa P. Frizzo, Marcos A. P.  
Martins, Nilo Zanatta, Bernardo A. Iglesias<sup>b</sup>, Helio G. Bonacorso<sup>a\*</sup>

<sup>a</sup>*Núcleo de Química de Heterociclos (NUQUIMHE), Departamento de Química,  
Universidade Federal de Santa Maria, 97105-900 – Santa Maria, RS – Brazil.*

<sup>b</sup>*Laboratório de Bioinorgânica e Materiais Porfirínicos, Departamento de Química,  
Universidade Federal de Santa Maria, 97105-900 – Santa Maria, RS – Brazil.*

*Email: [helio.bonacorso@ufsm.br](mailto:helio.bonacorso@ufsm.br)*

|                          |    |
|--------------------------|----|
| 1. General .....         | 2  |
| 2. NMR Spectra.....      | 4  |
| 3. UV-Vis analysis ..... | 21 |
| 4. References .....      | 28 |

## 1. General

$^1\text{H}$  and  $^{13}\text{C}$  NMR spectra were acquired on Bruker DPX 400 MHz (**3a-g**, **3i-k**) or on a Bruker Avance III 600 MHz (**3h**, **4**, **5**, **6**) spectrometers for one-dimensional experiments, with 5-mm sample tubes, 298 K, and digital resolution of 0.01 ppm, in  $\text{CDCl}_3$  as solvent, and using TMS as the internal reference. All spectra can be found in Figures S1–S33 in the *Supplementary information*. All results are reported with the chemical shift ( $\delta$ ), multiplicity, integration, and coupling constant (Hz). The following abbreviations were used to explain multiplicities: s = singlet, d = doublet, t = triplet, q = quartet, m = multiplet, and dd = double doublet. All NMR chemical shifts were reported in parts per million, which is relative to the internal reference. The CHN elemental analyses were performed on a Perkin–Elmer 2400 CHN elemental analyzer (University of São Paulo, USP, Brazil). The HRMS analyses were performed on a hybrid high-resolution and high-accuracy (5  $\mu\text{L/L}$ ) micrOTOF-Q mass spectrometer (Bruker Scientific®, Billerica, MA, USA) at (Caxias do Sul University, UCS, Brazil).

For mass spectrometry, the fractions were dissolved in a solution consisting of 50% (v/v) chromatographic grade acetonitrile (Tedia, Fairfield, OH, USA) and 50% (v/v) deionized water, to which 0.1% formic acid and 0.1% ammonium formate had been added, for analysis in positive ESI(+). The individual solutions were infused directly into the ESI source via a syringe pump (Harvard Apparatus, Hamilton, Reno, NV, USA), at a flow rate of 180  $\mu\text{L/min}$ . The ESI(+)-and ESI(-) mass spectrometric (MS) and tandem MS-MS profiles were acquired using a hybrid high-resolution and high-accuracy (5  $\mu\text{L/L}$ ) micrOTOF-Q mass spectrometer (Bruker Scientific®, Billerica, MA, USA) under the following conditions: capillary and cone voltages were set to +3500 and +40V, respectively, with a desolvation temperature of 200°C. The collision-induced dissociation energy (CID) for the ESI (+) MS-MS was optimized for each component. For data acquisition and processing, time-of-flight (TOF) control and data analysis software (Bruker Scientific®) was used. The data were collected in the 70–800  $m/z$  range, at a rate of two scans/s, providing 50,000 full width at half maximum (FWHM) resolution at 200  $m/z$ . No important ions were observed below 90  $m/z$  and above 1000  $m/z$ , so the ESI(+)-MS data are shown for the range of 90–1000  $m/z$ .<sup>1</sup>

Electronic UV-Vis absorption analysis of compounds in  $\text{CH}_3\text{CN}$ ,  $\text{CH}_2\text{Cl}_2$  and DMSO solutions were done with a Shimadzu UV2600 spectrophotometer (data interval of 1.0 nm) at 250 to 500 nm range. Steady-state emission fluorescence analysis of samples

in CH<sub>3</sub>CN, CH<sub>2</sub>Cl<sub>2</sub> and DMSO solutions were measured with a Varian Cary50 fluorescence spectrophotometer (slit of 5.0 mm; em/exc) and corrected according to the manufacturer's instructions. Fluorescence quantum yield values ( $\Phi_{\text{fl}}$ ) of the compounds in solution were determined by comparing the corrected fluorescence spectra with that of 9,10-diphenylanthracene (DPA) in chloroform ( $\Phi_{\text{fl}} = 0.65$ ,  $\lambda_{\text{ex}} = 366$  nm) as the standard for the fluorescence yield. All spectra can be found in Figures S34–S48 in the *Supplementary information*.

## 2. NMR Spectra

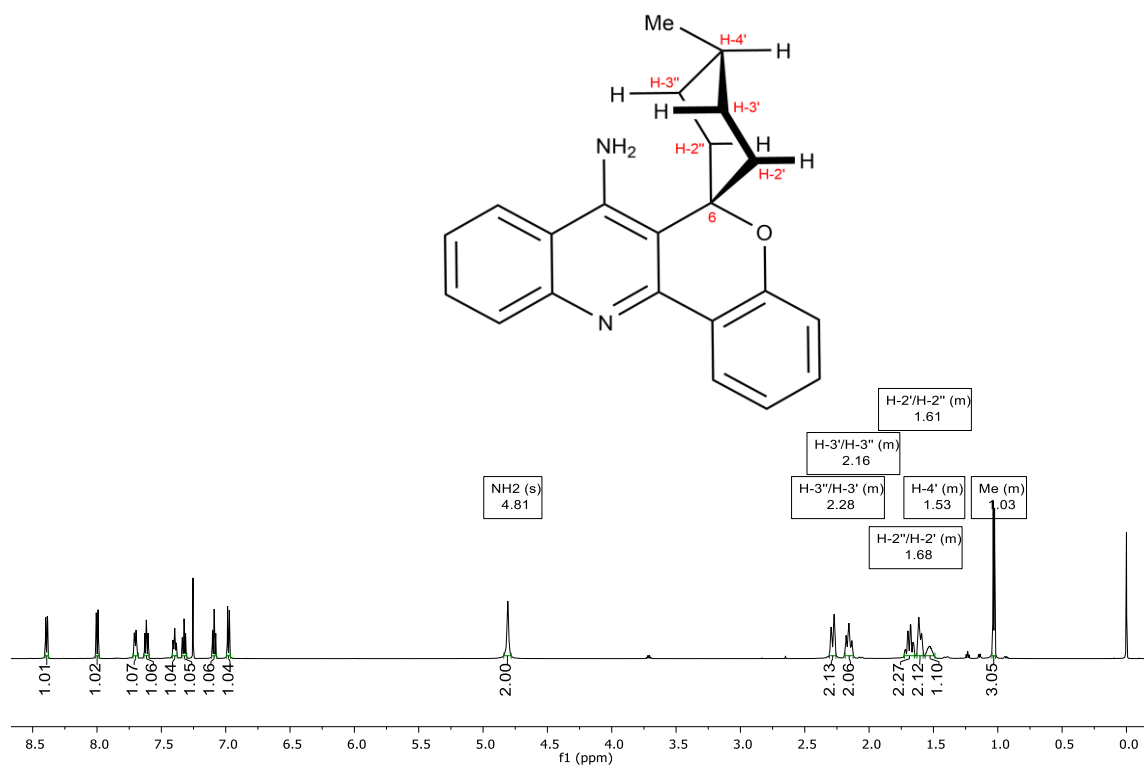

**Figure S1.** <sup>1</sup>H NMR spectra at 600 MHz in CDCl<sub>3</sub> of compound **1d**

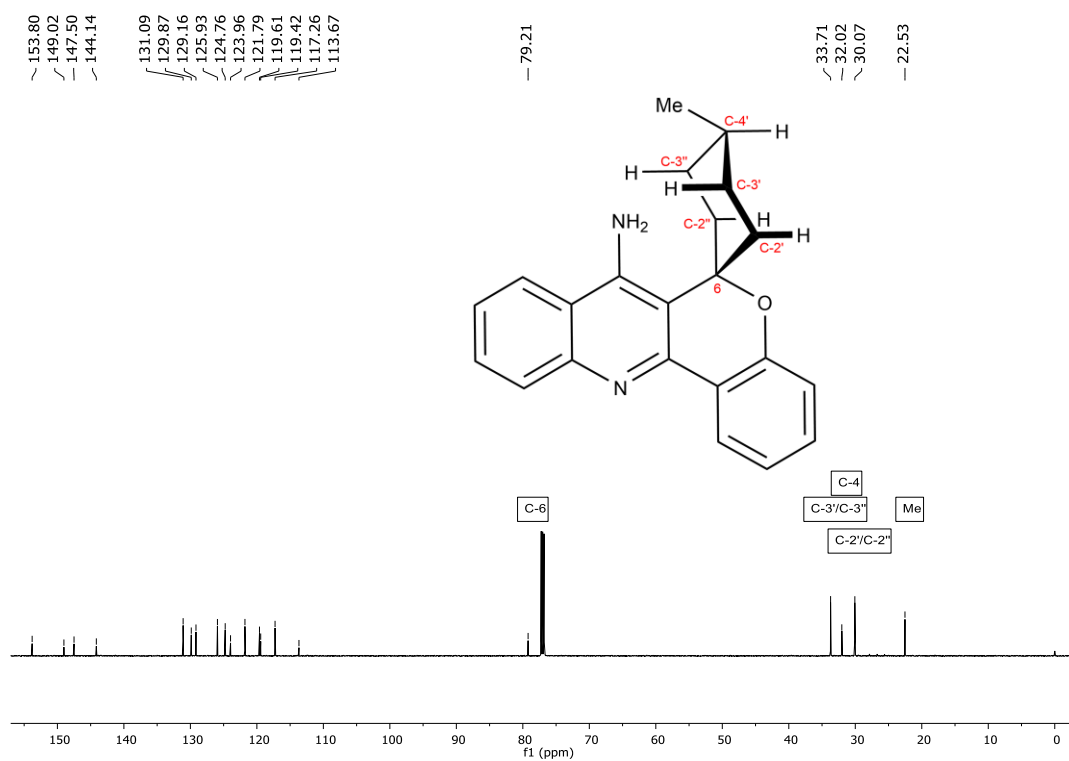

**Figure S2.** <sup>13</sup>C NMR spectra at 150 MHz in CDCl<sub>3</sub> of compound **1d**.

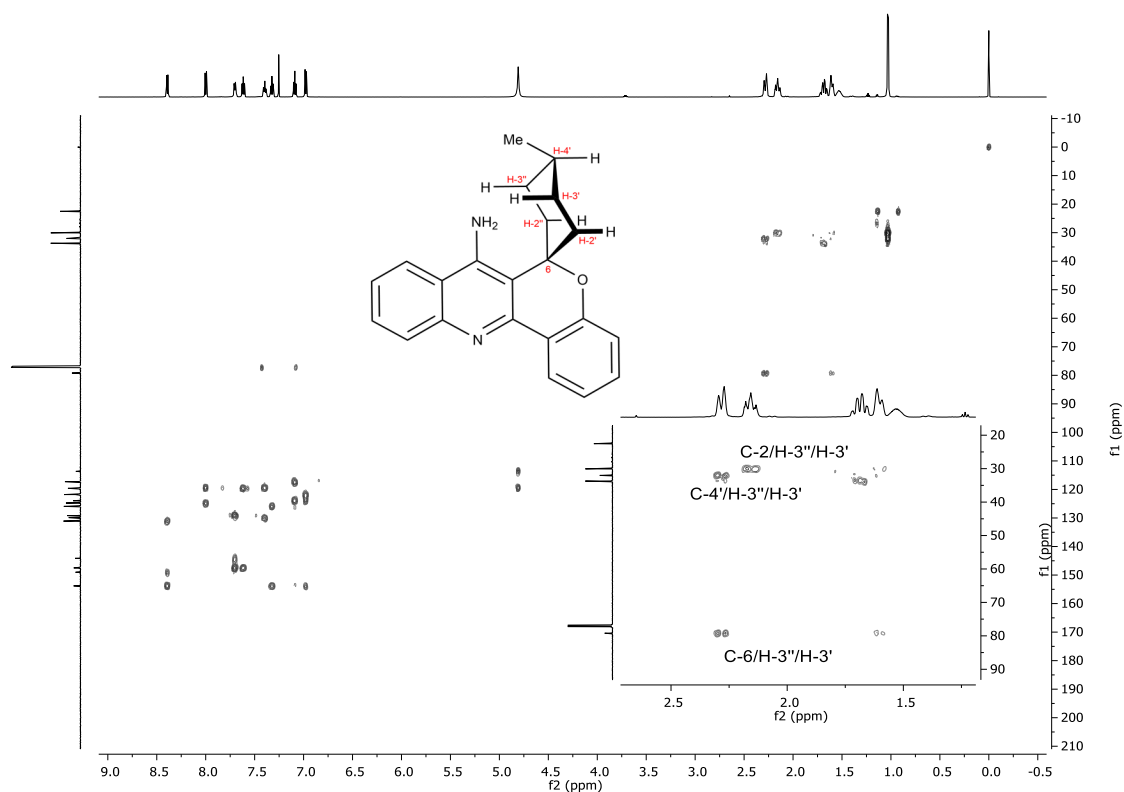

**Figure S3.**  $^{13}\text{C}$ - $^1\text{H}$  HMBC spectra at 150 MHz in  $\text{CDCl}_3$  of compound **1d**.

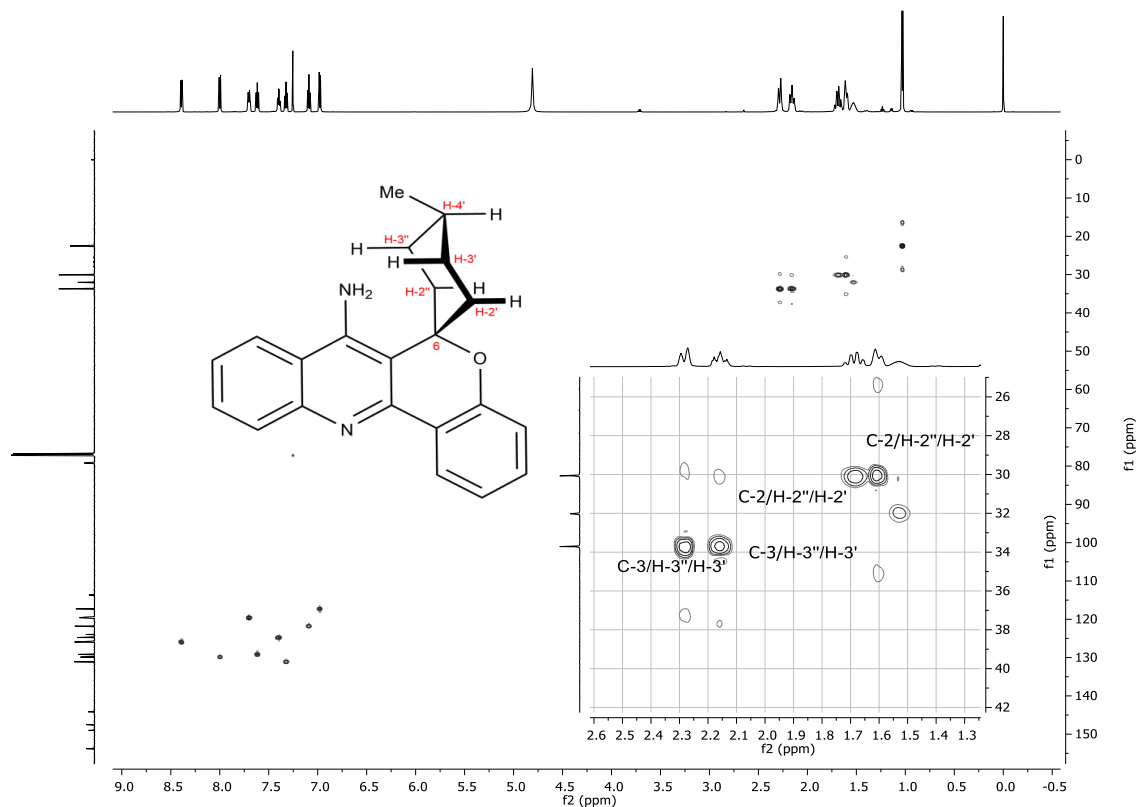

**Figure S4.**  $^{13}\text{C}$ - $^1\text{H}$  HSQC spectra at 150 MHz in  $\text{CDCl}_3$  of compound **1d**.

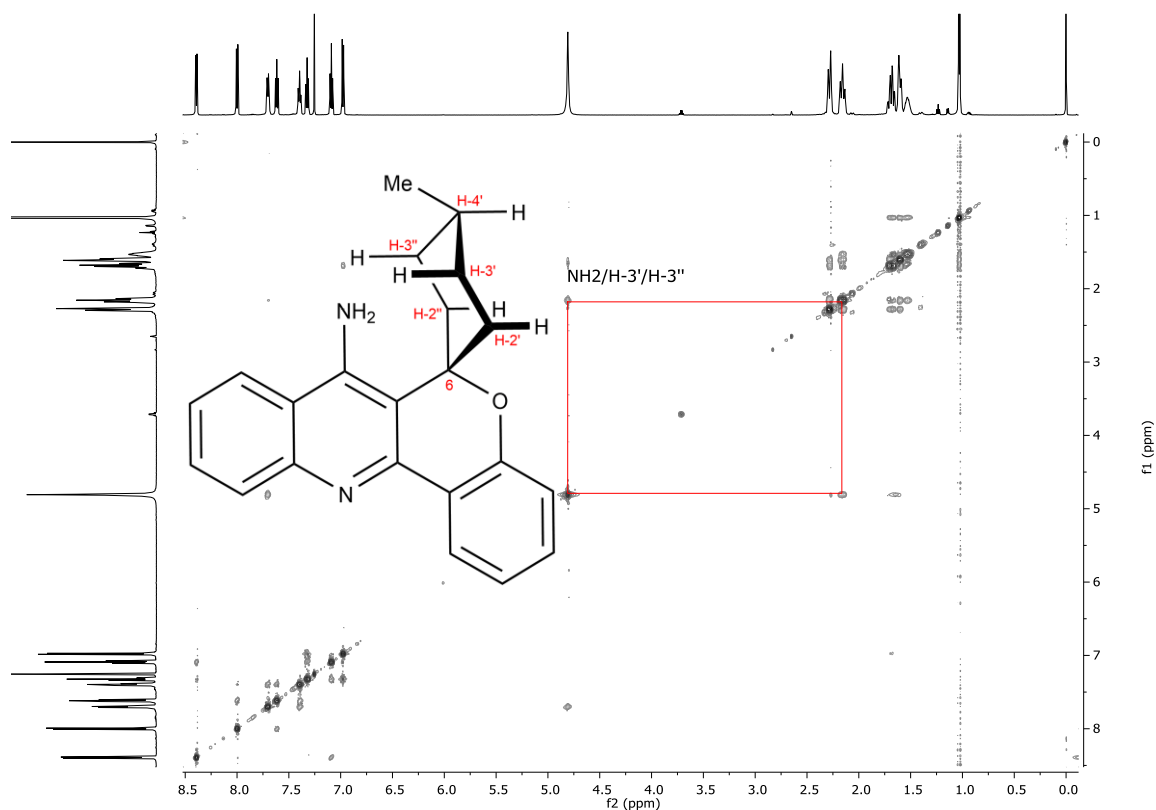

**Figure S5.**  $^1\text{H}$ - $^1\text{H}$  NOESY spectra at 600 MHz in  $\text{CDCl}_3$  of compound **1d**.

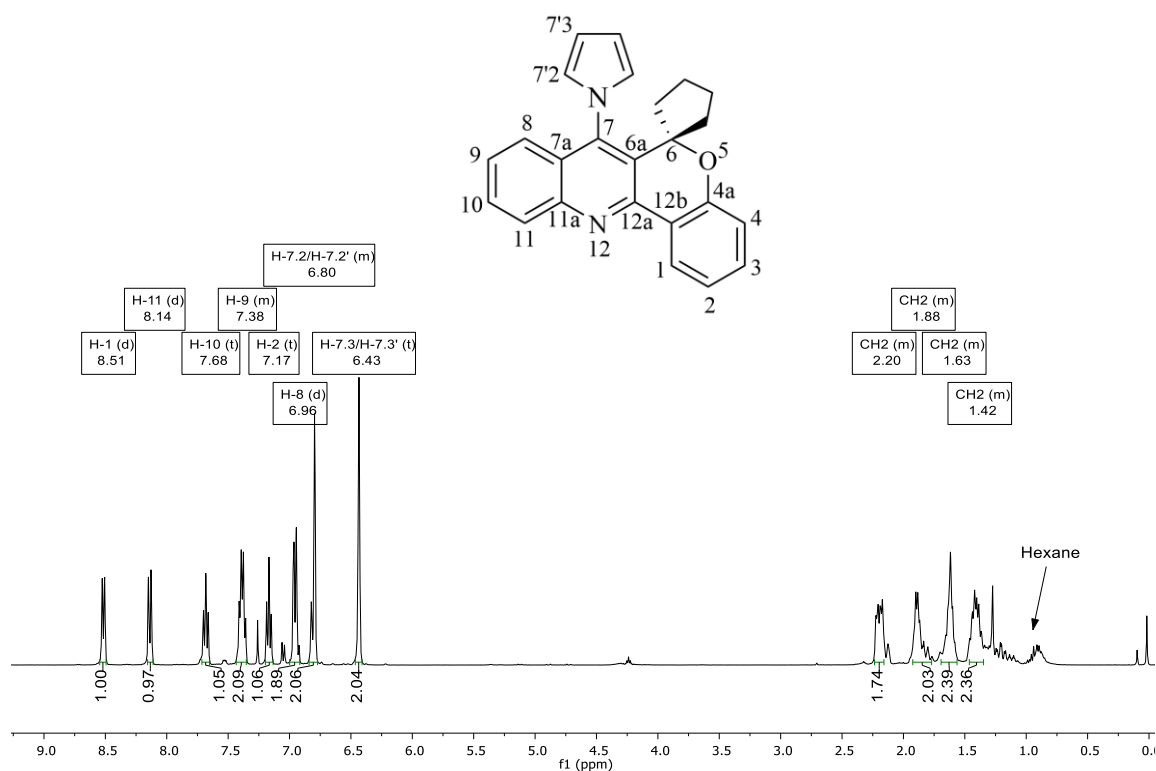

**Figure S6.**  $^1\text{H}$  NMR spectra at 400 MHz in  $\text{CDCl}_3$  of compound **3a**.

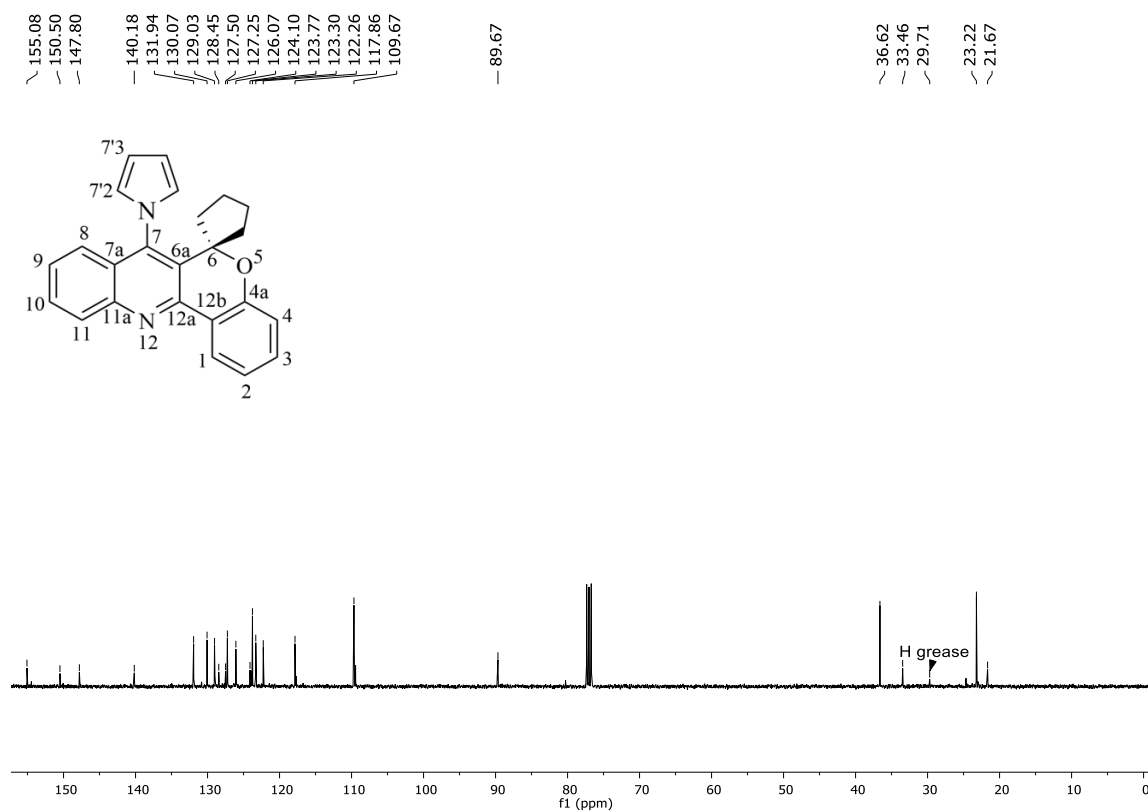

**Figure S7.**  $^{13}\text{C}$  NMR spectra at 150 MHz in  $\text{CDCl}_3$  of compound **3a**.

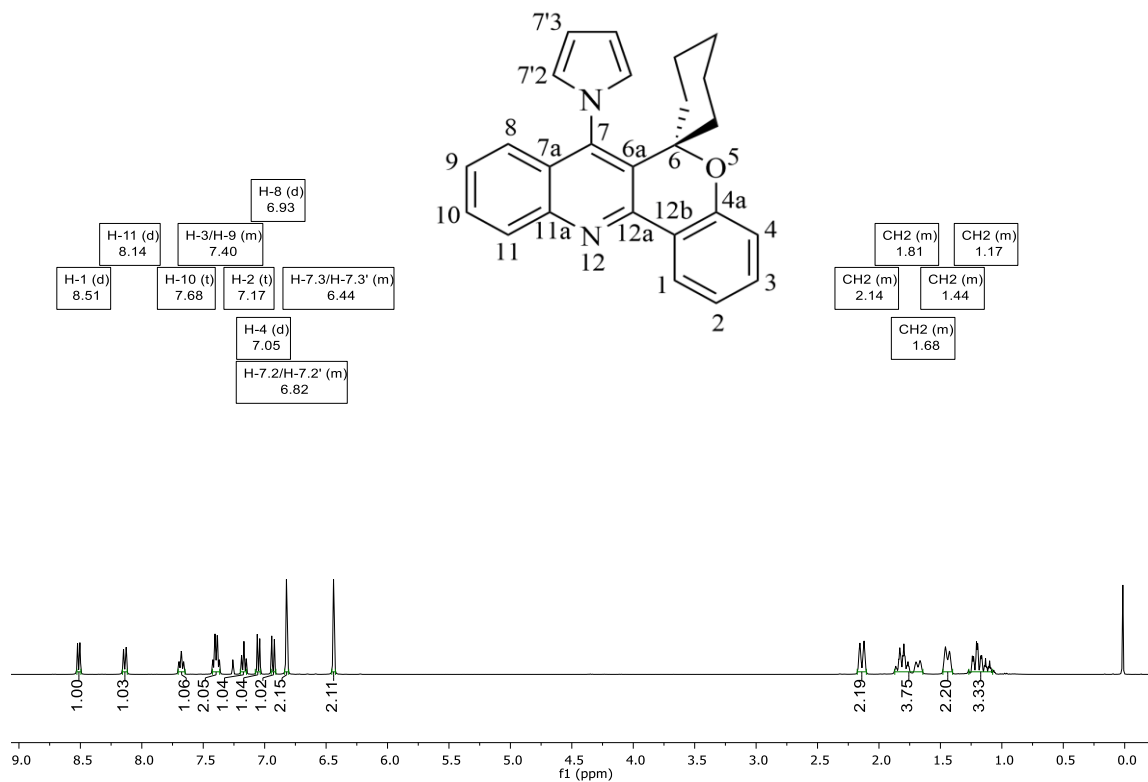

**Figure S8.**  $^1\text{H}$  NMR spectra at 400 MHz in  $\text{CDCl}_3$  of compound **3b**.

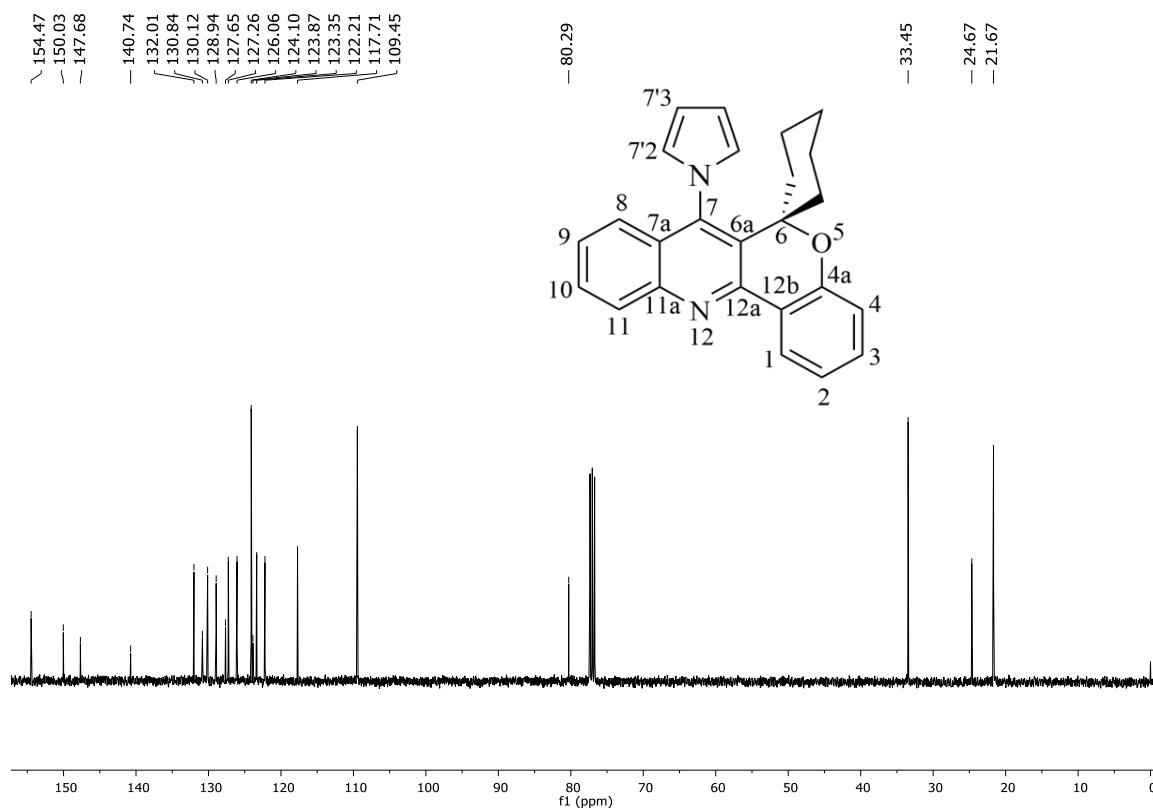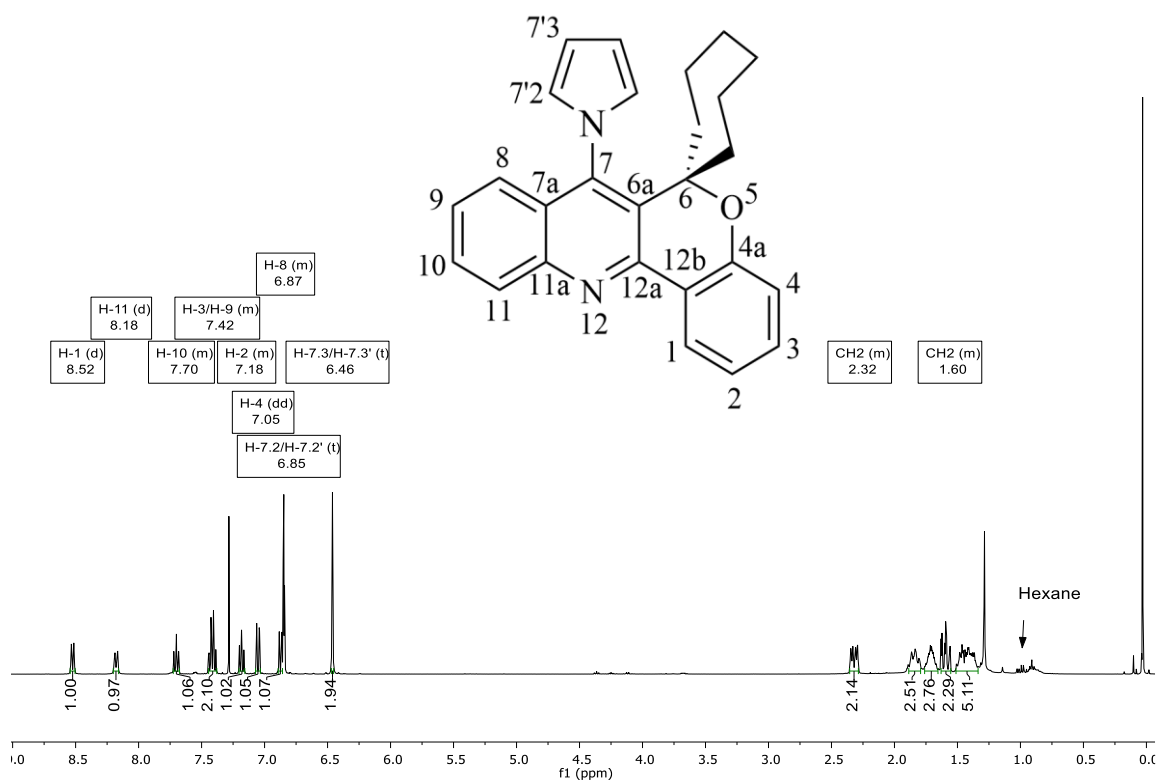

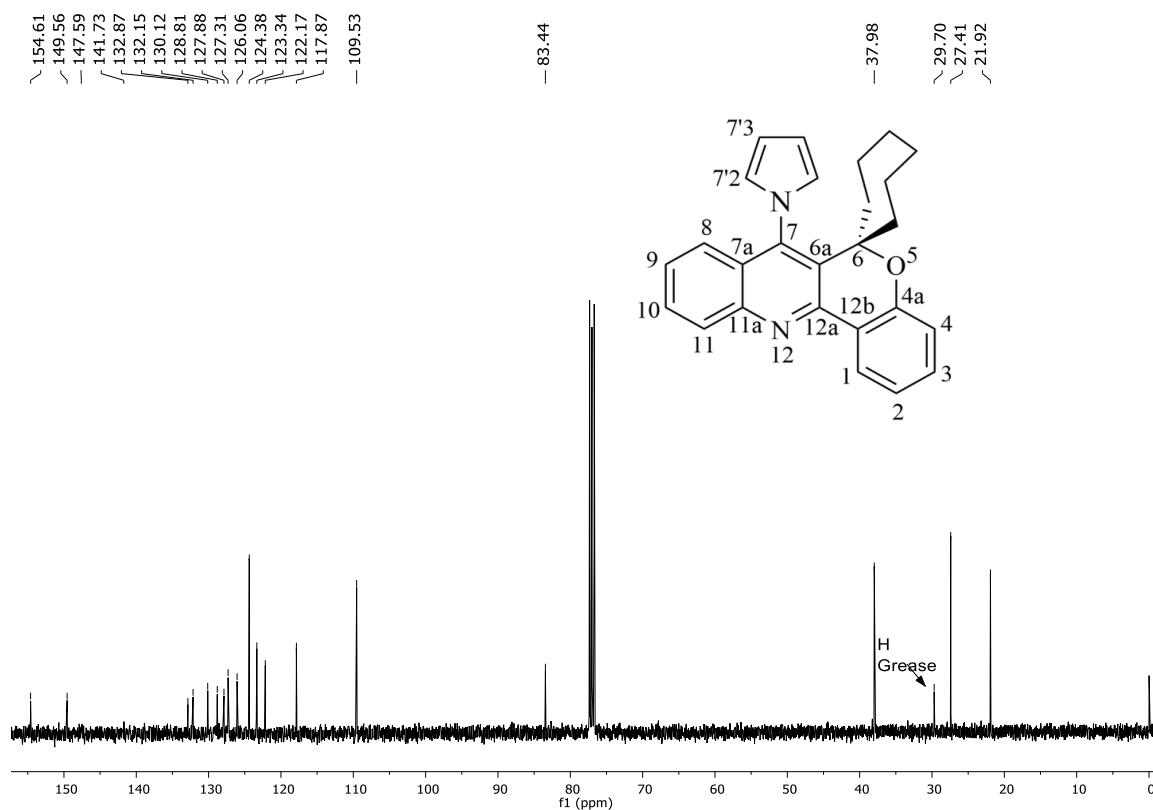

**Figure S11.** <sup>13</sup>C NMR spectra at 100 MHz in CDCl<sub>3</sub> of compound **3c**

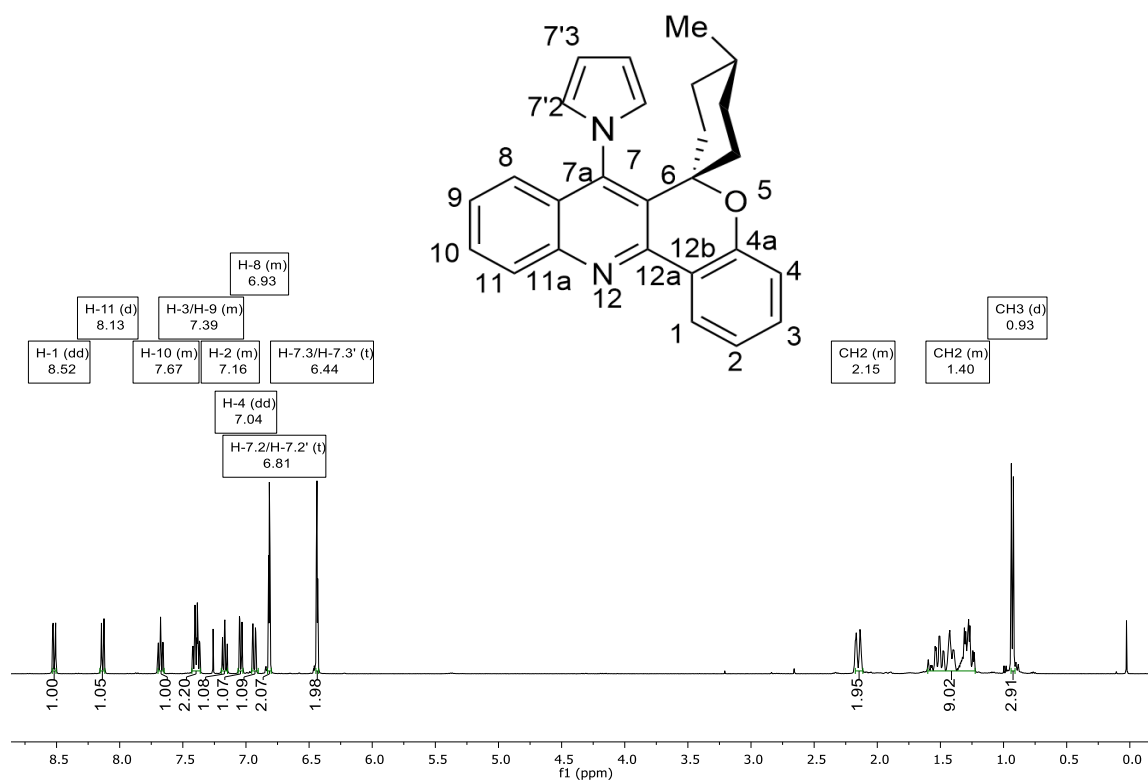

**Figure S12.** <sup>1</sup>H NMR spectra at 400 MHz in CDCl<sub>3</sub> of compound **3d**

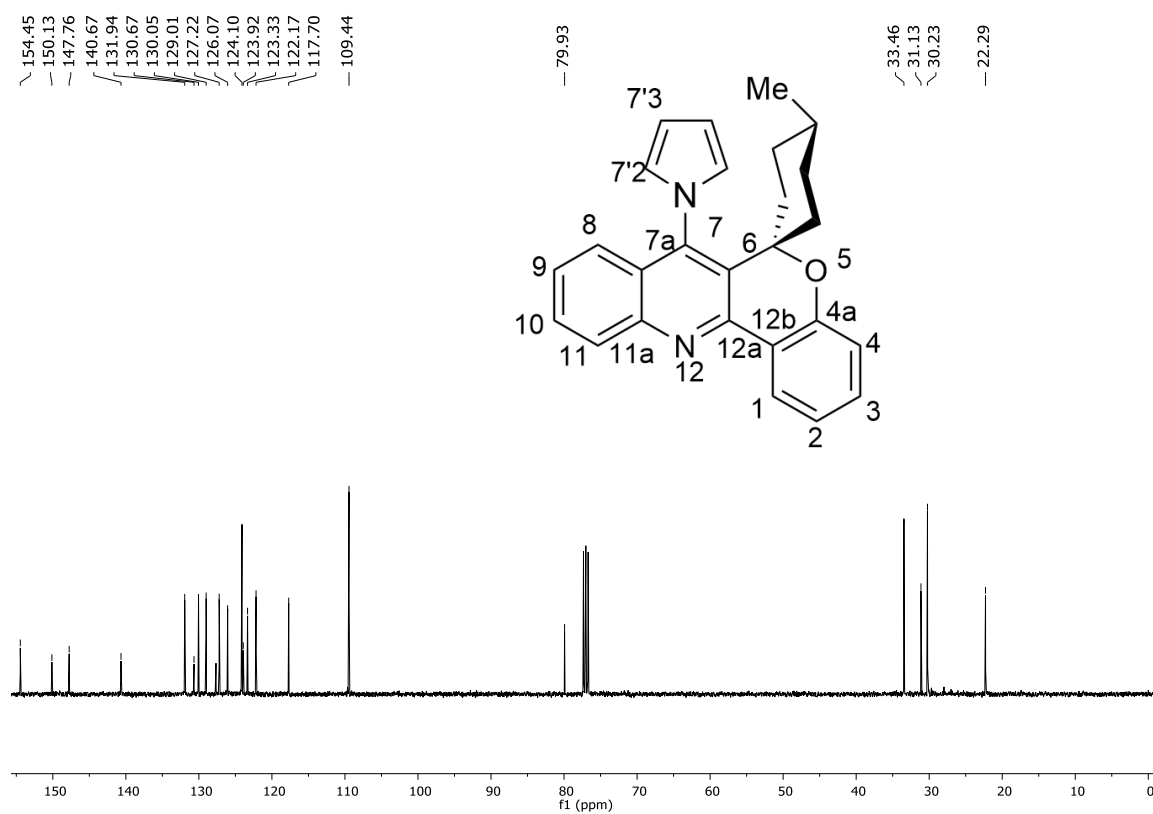

**Figure S13.**  $^{13}\text{C}$  NMR spectra at 100 MHz in  $\text{CDCl}_3$  of compound **3d**

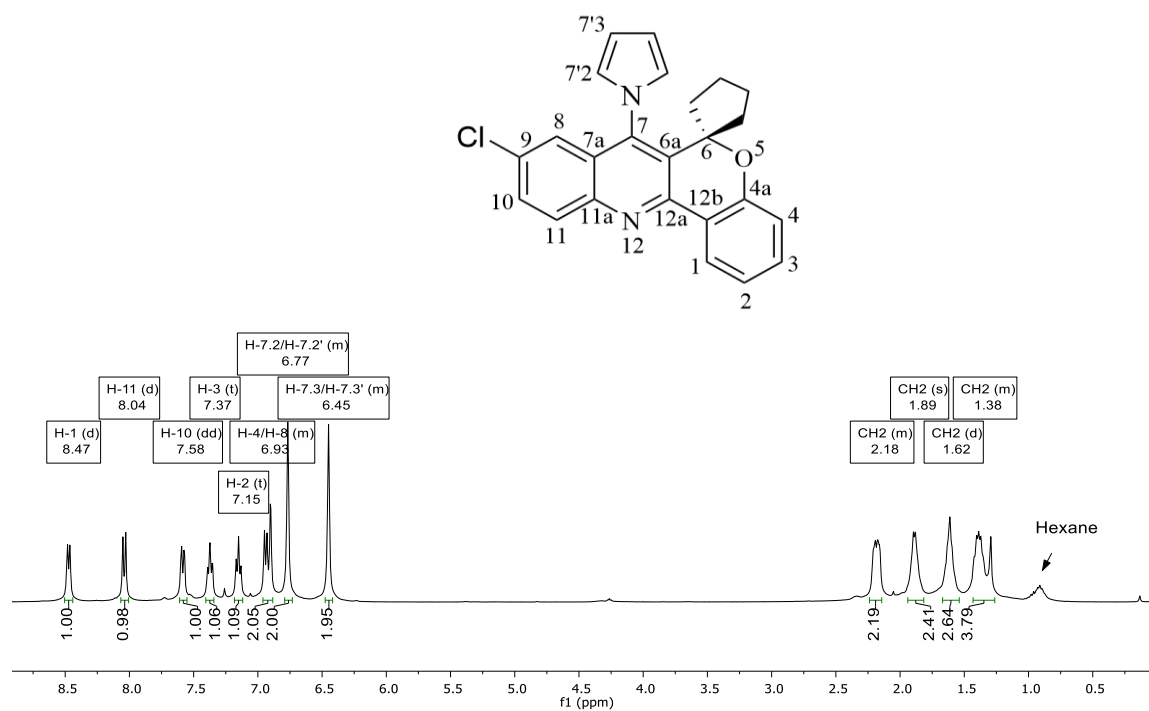

**Figure S14.** <sup>1</sup>H NMR spectra at 400 MHz in CDCl<sub>3</sub> of compound **3e**

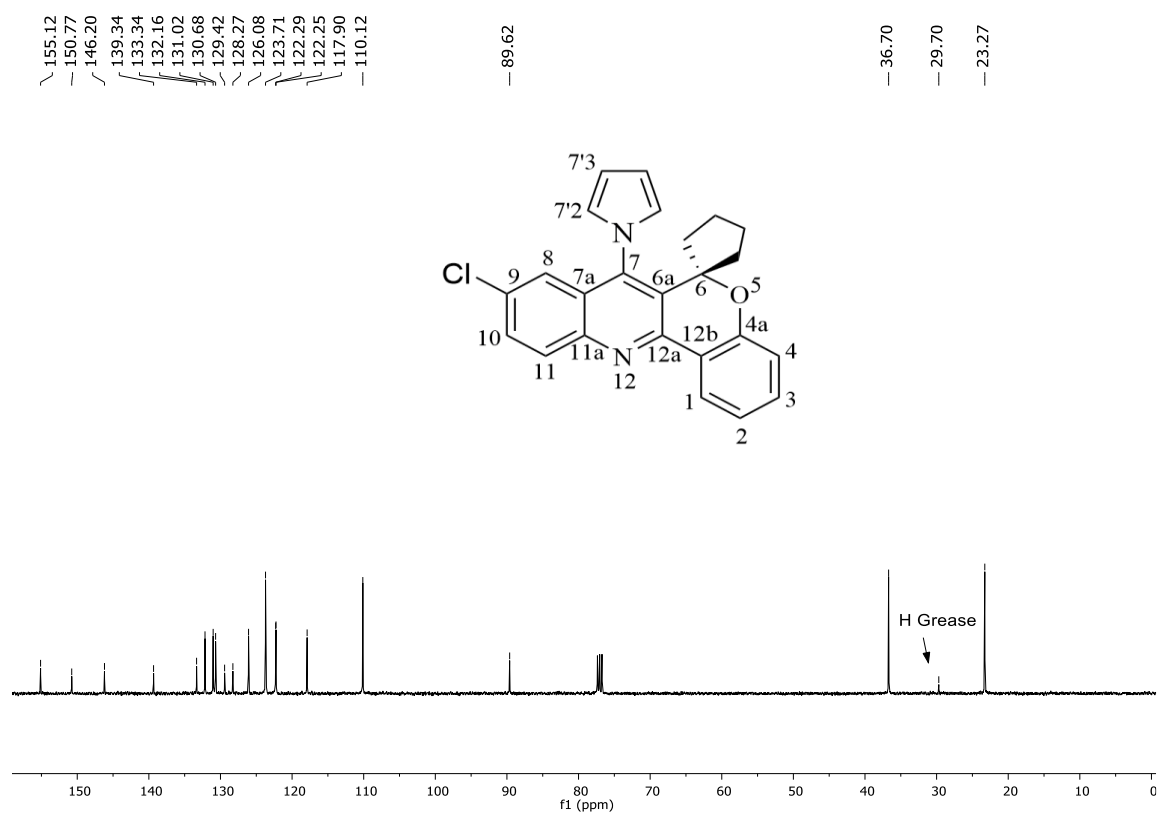

**Figure S15.** <sup>13</sup>C NMR spectra at 100 MHz in CDCl<sub>3</sub> of compound **3e**

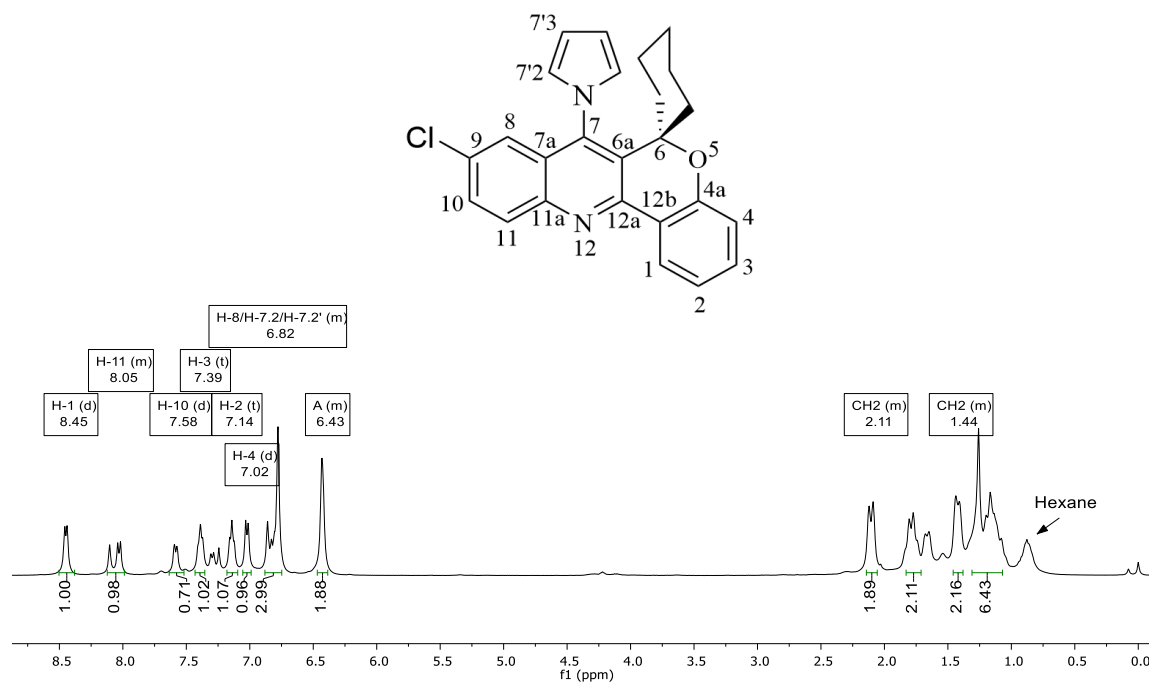

**Figure S16.**  $^1\text{H}$  NMR spectra at 400 MHz in  $\text{CDCl}_3$  of compound **3f**

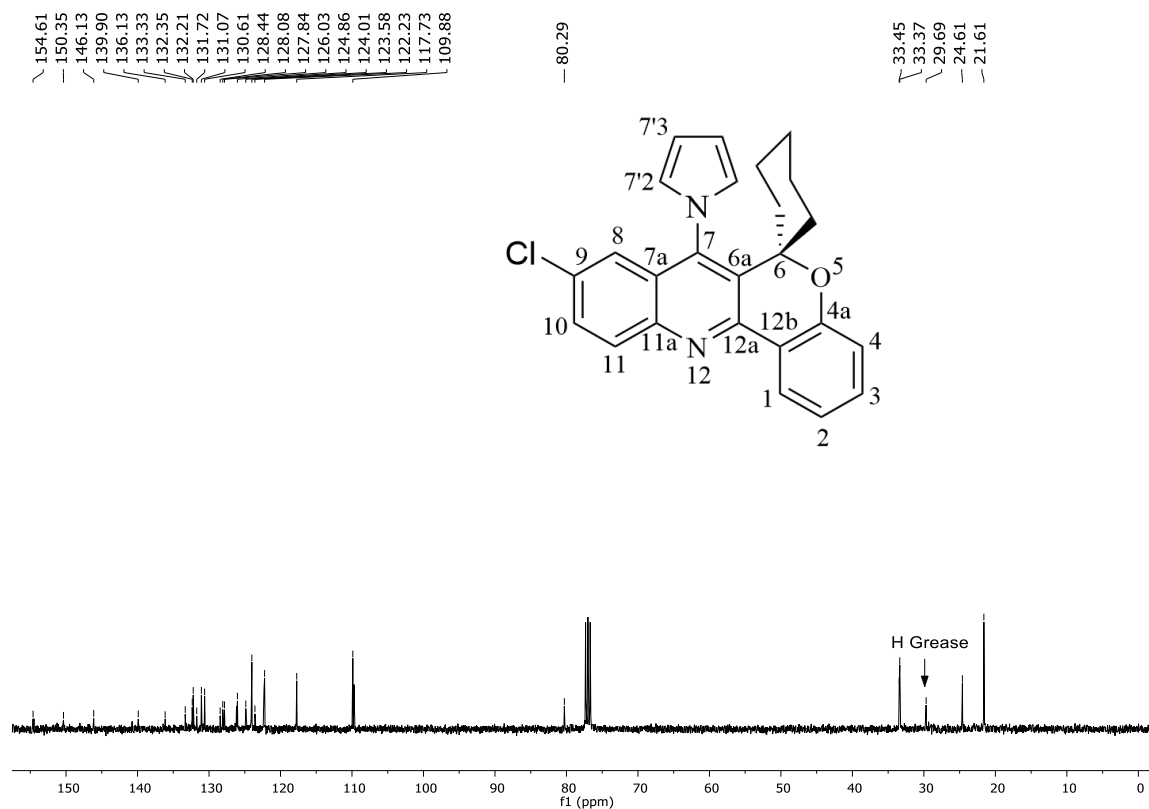

**Figure S17.**  $^{13}\text{C}$  NMR spectra at 100 MHz in  $\text{CDCl}_3$  of compound **3f**

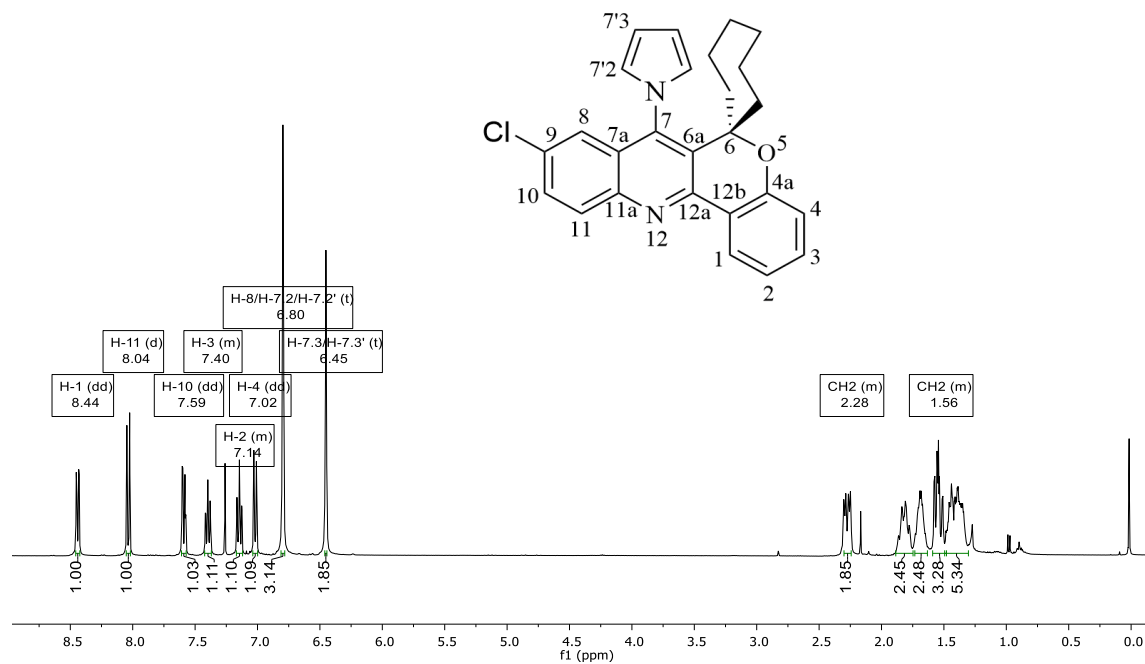

**Figure S18.** <sup>1</sup>H NMR spectra at 400 MHz in CDCl<sub>3</sub> of compound **3g**

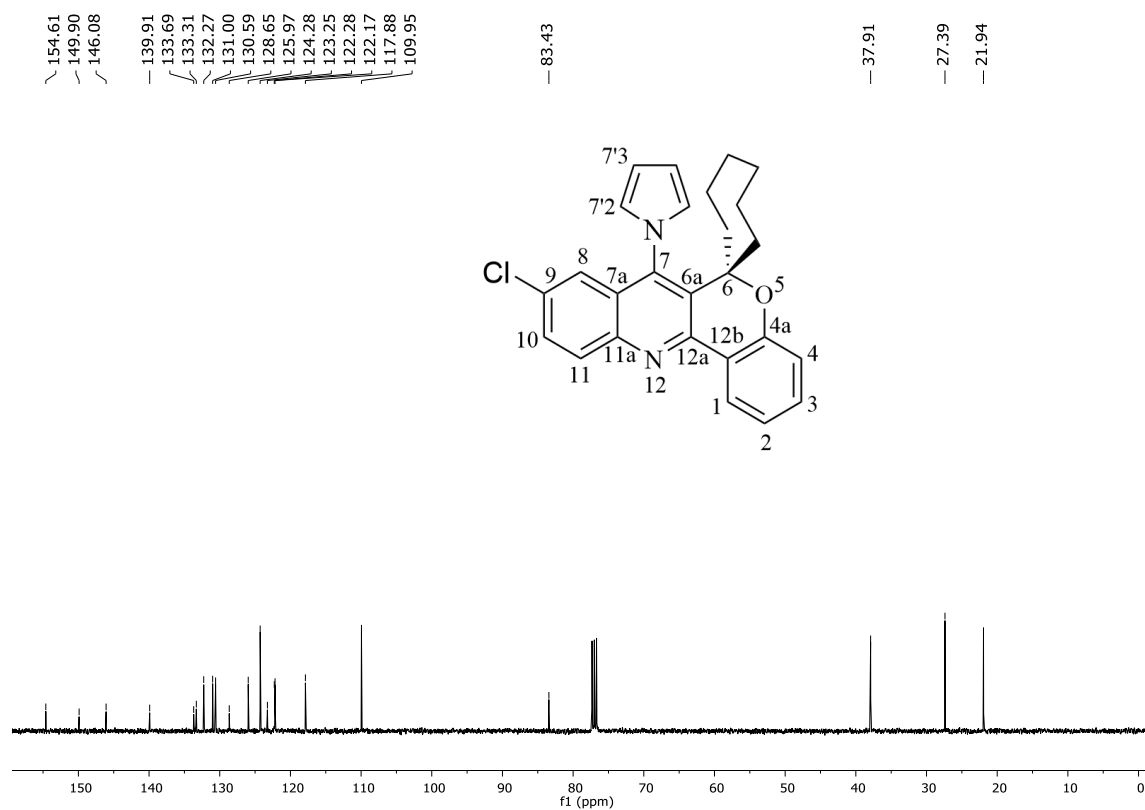

**Figure S19.** <sup>13</sup>C NMR spectra at 100 MHz in CDCl<sub>3</sub> of compound **3g**

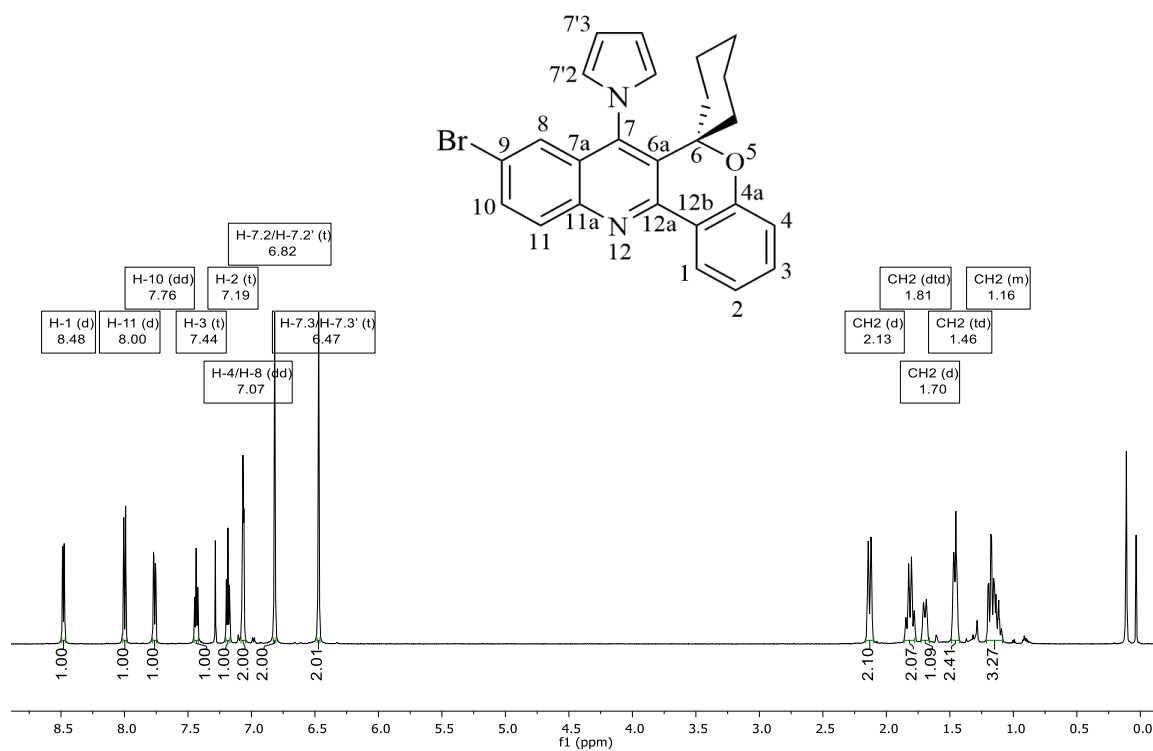

**Figure S20.** <sup>1</sup>H NMR spectra at 600 MHz in CDCl<sub>3</sub> of compound **3h**

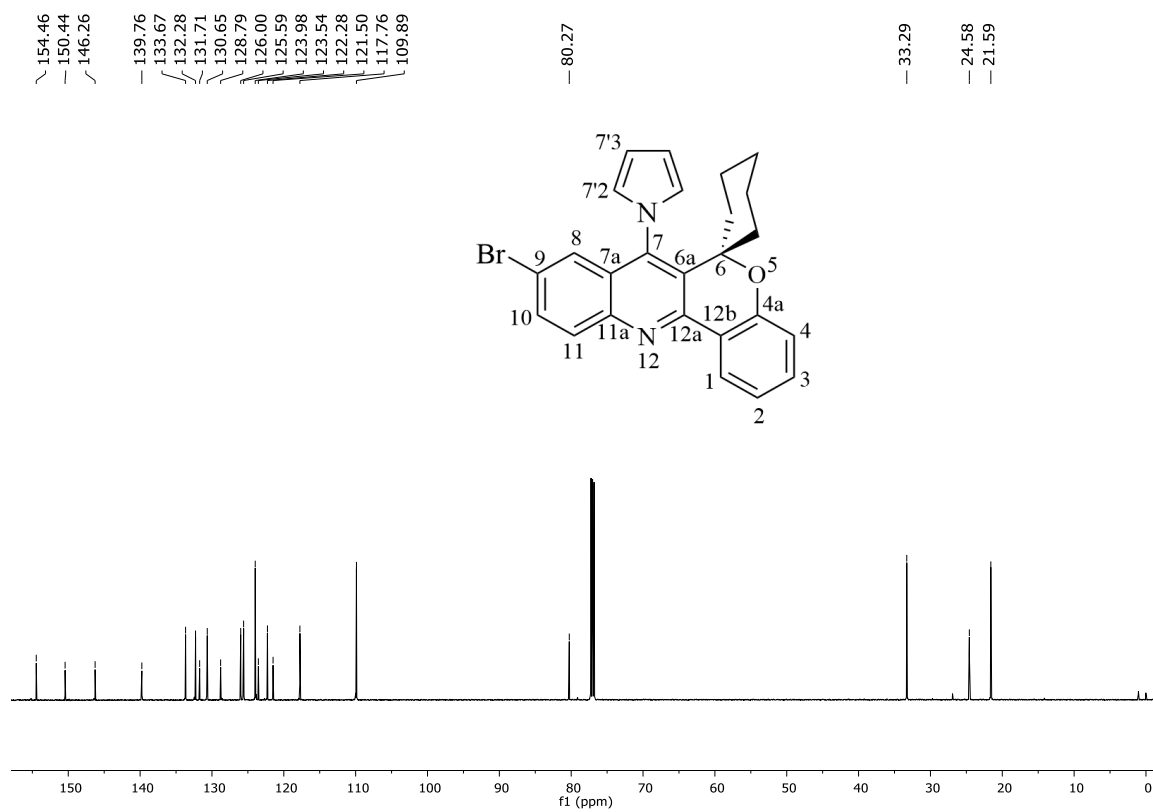

**Figure S21.** <sup>13</sup>C NMR spectra at 150 MHz in CDCl<sub>3</sub> of compound **3h**

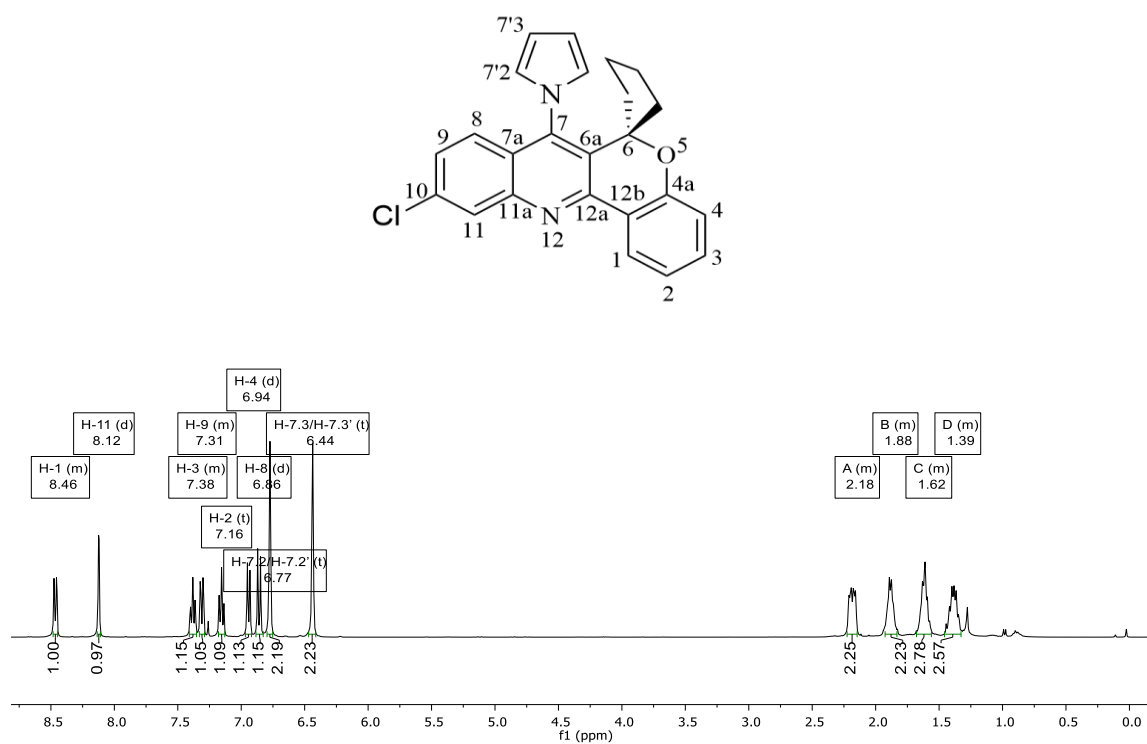

**Figure S22.**  $^1\text{H}$  NMR spectra at 400 MHz in  $\text{CDCl}_3$  of compound **3i**

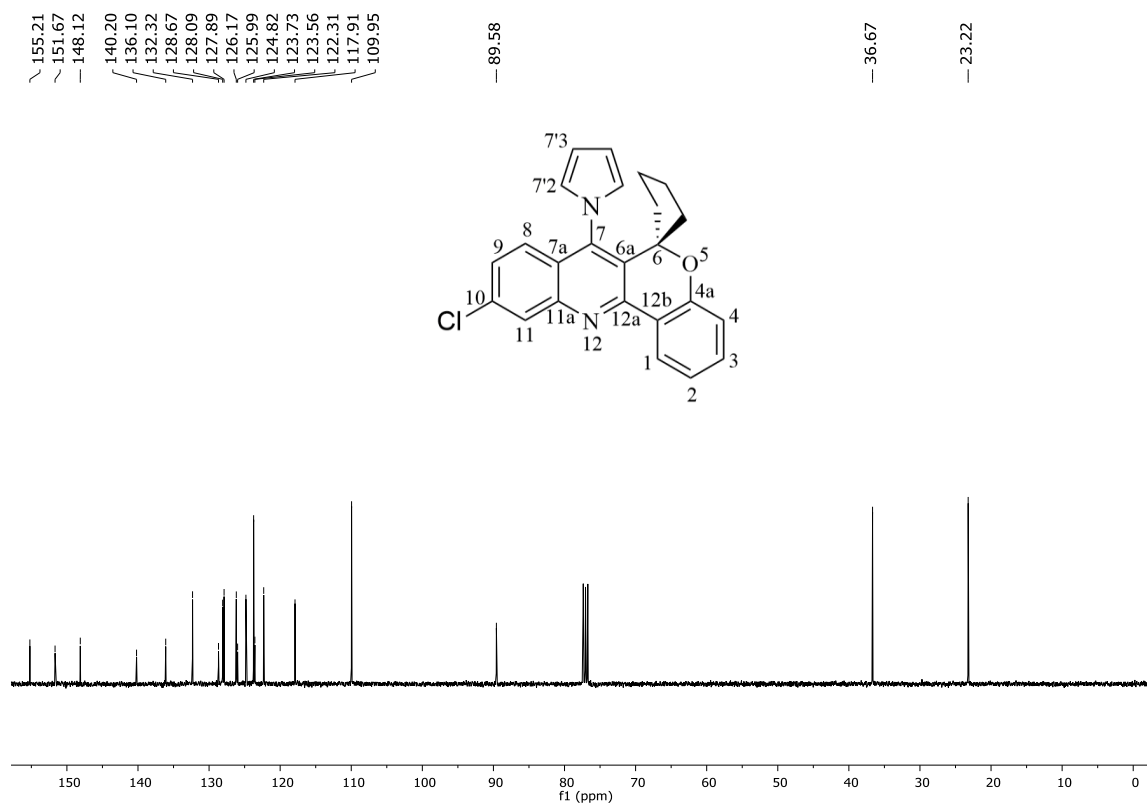

**Figure S23.**  $^{13}\text{C}$  NMR spectra at 100 MHz in  $\text{CDCl}_3$  of compound **3i**

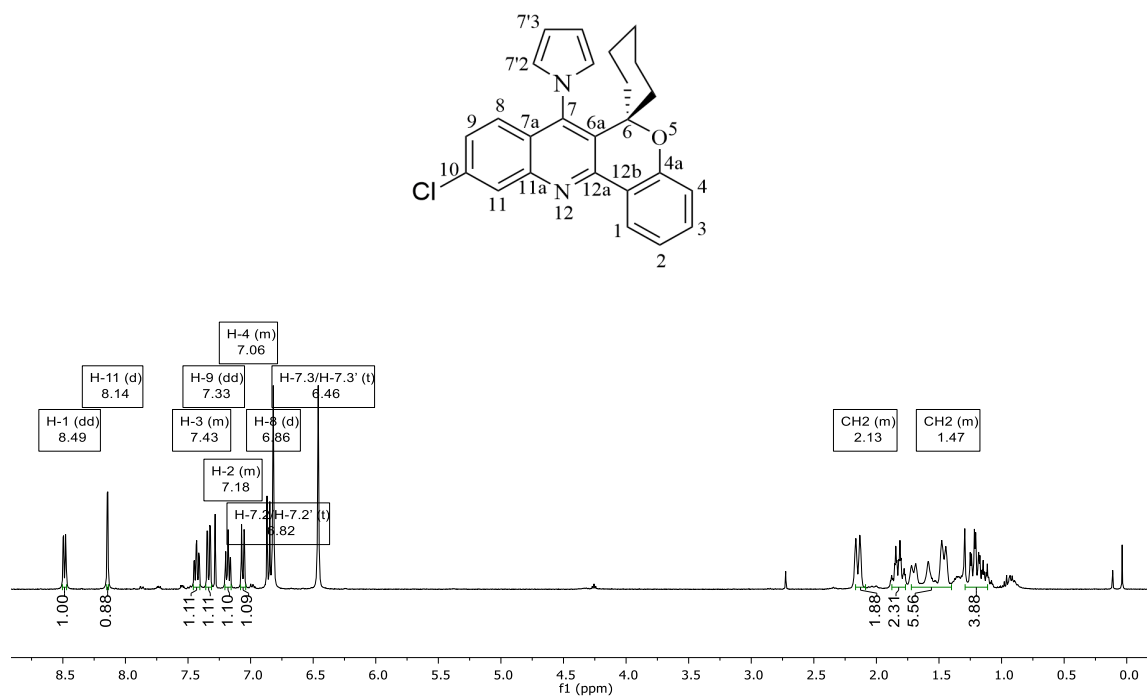

**Figure S24.**  $^1\text{H}$  NMR spectra at 400 MHz in  $\text{CDCl}_3$  of compound **3j**

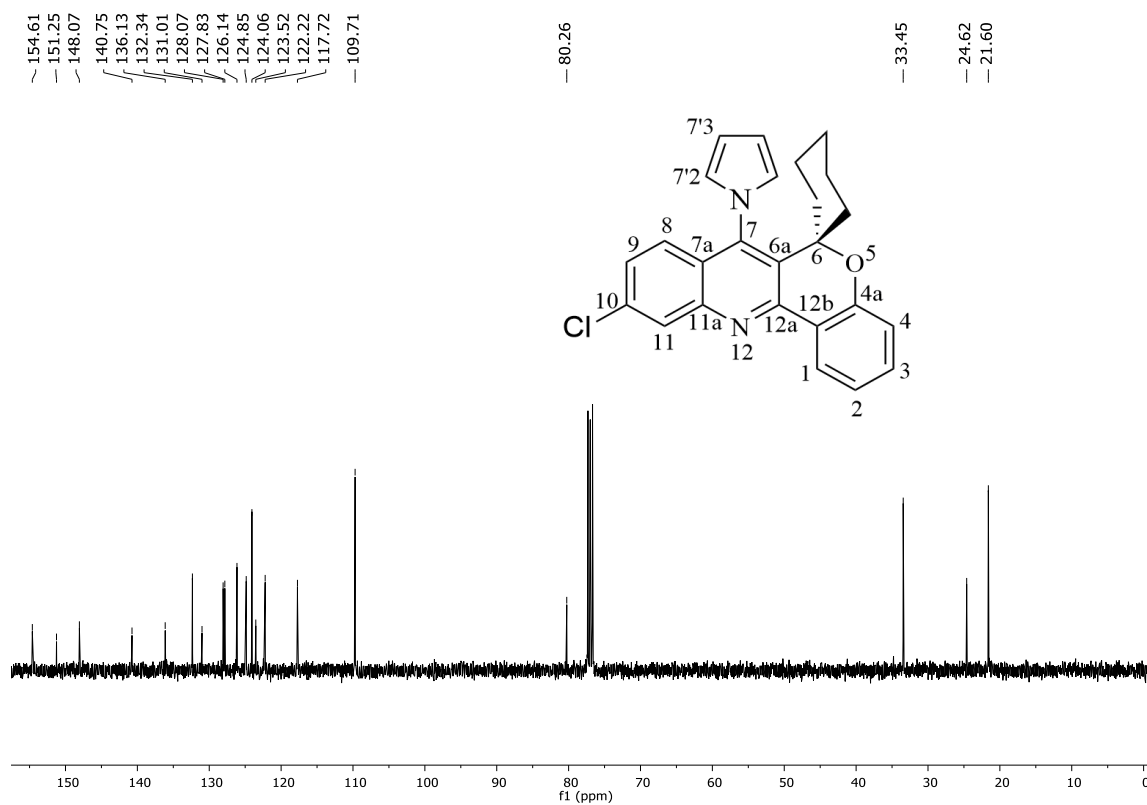

**Figure S25.**  $^{13}\text{C}$  NMR spectra at 100 MHz in  $\text{CDCl}_3$  of compound **3j**

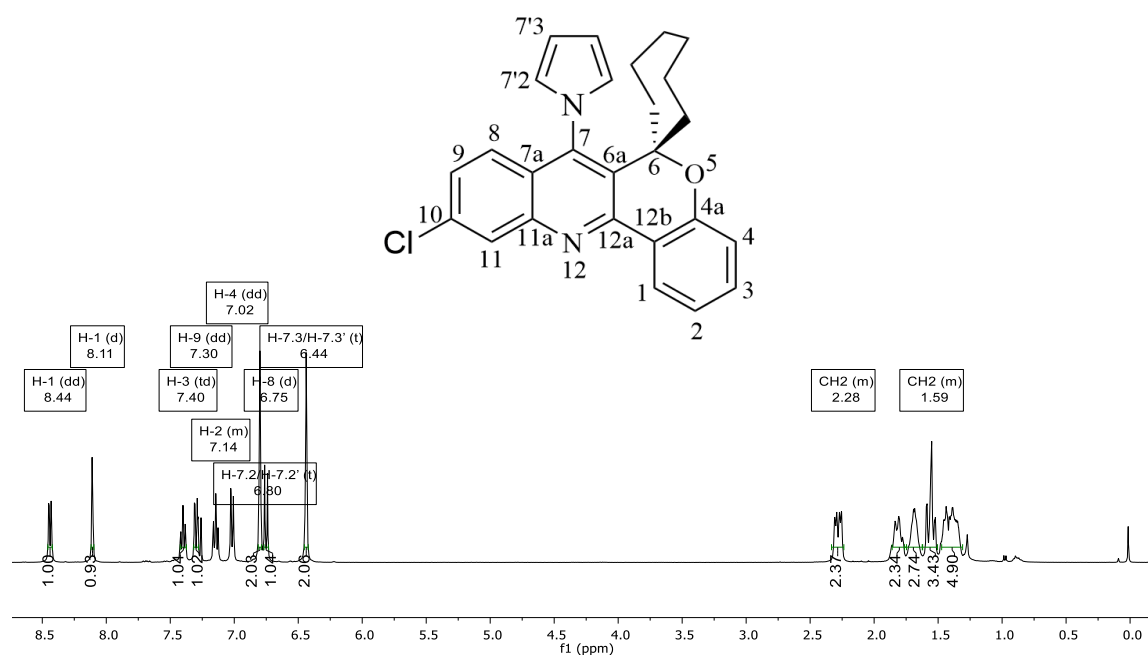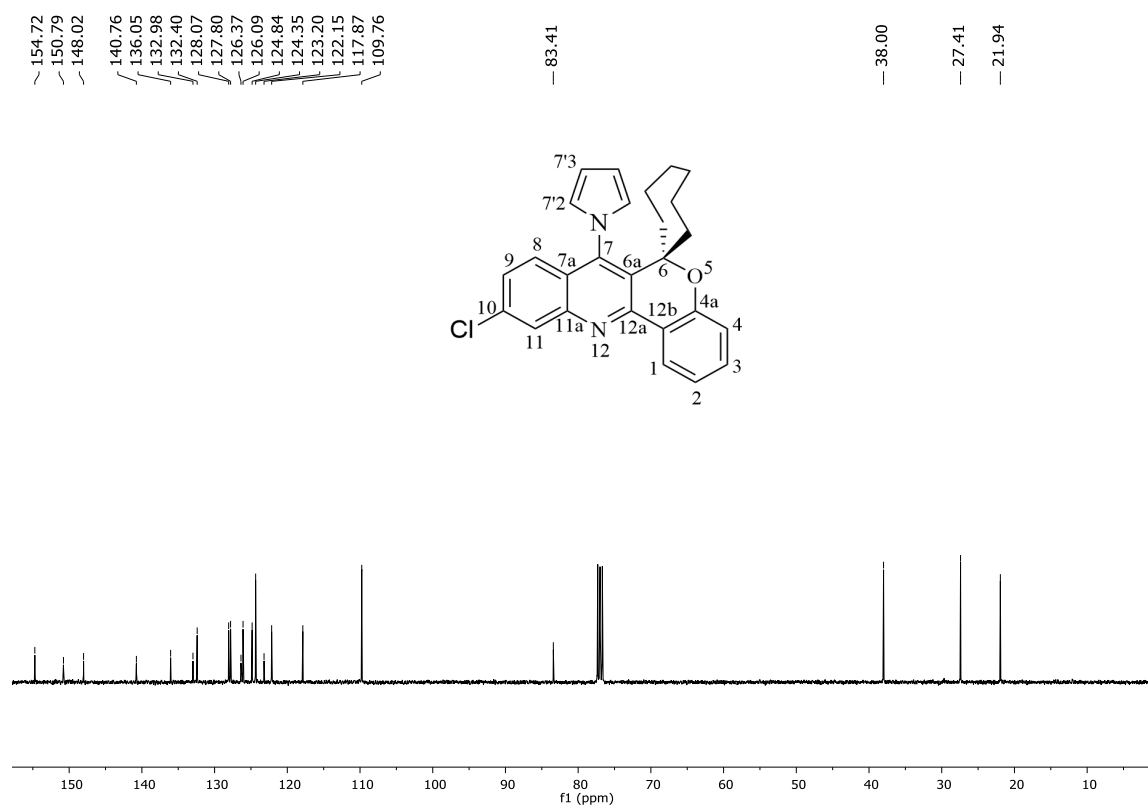

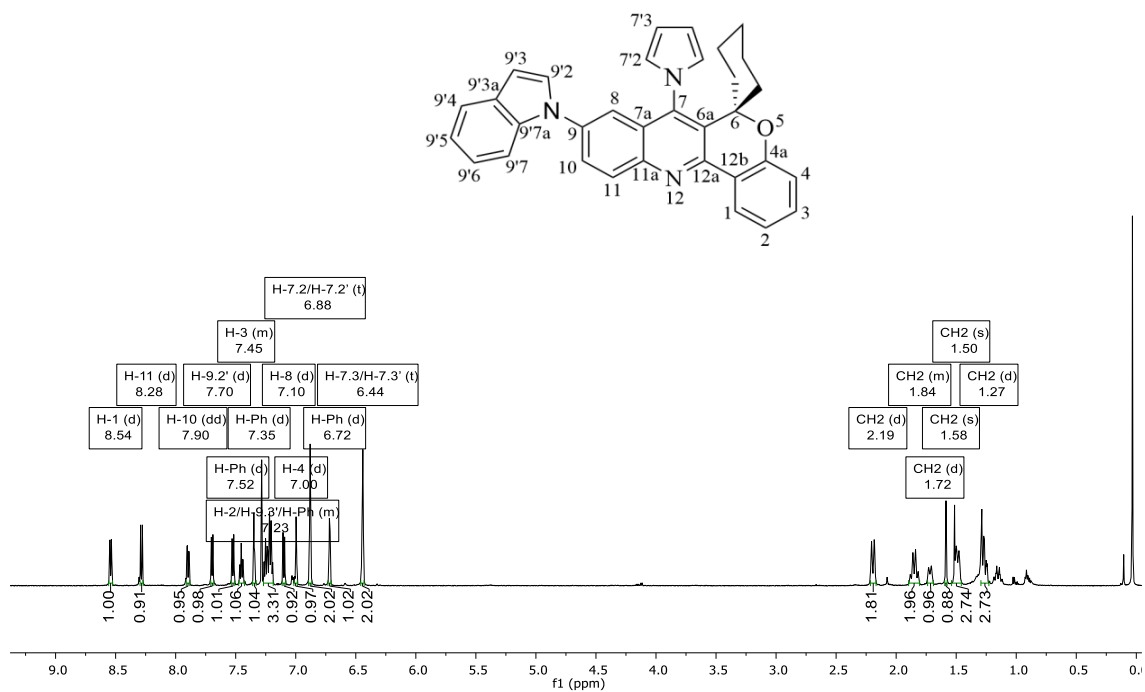

**Figure S28.** <sup>1</sup>H NMR spectra at 600 MHz in CDCl<sub>3</sub> of compound **4**

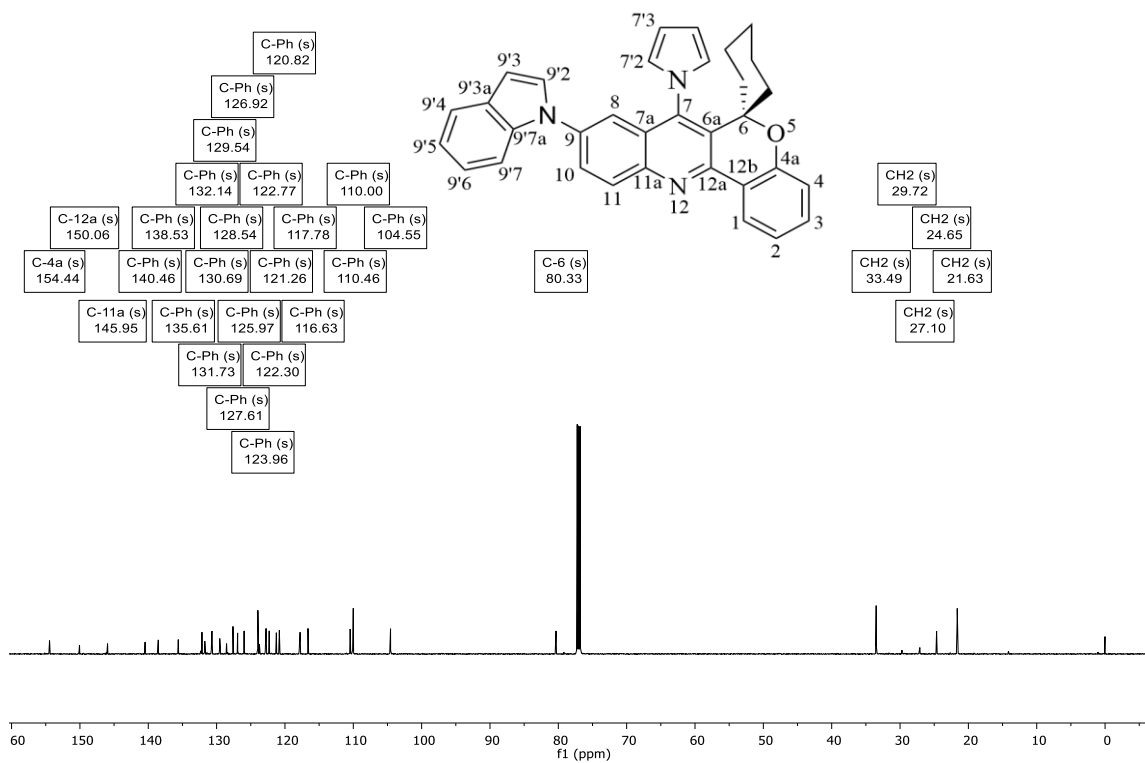

**Figure S29.** <sup>13</sup>C NMR spectra at 150 MHz in CDCl<sub>3</sub> of compound **4**

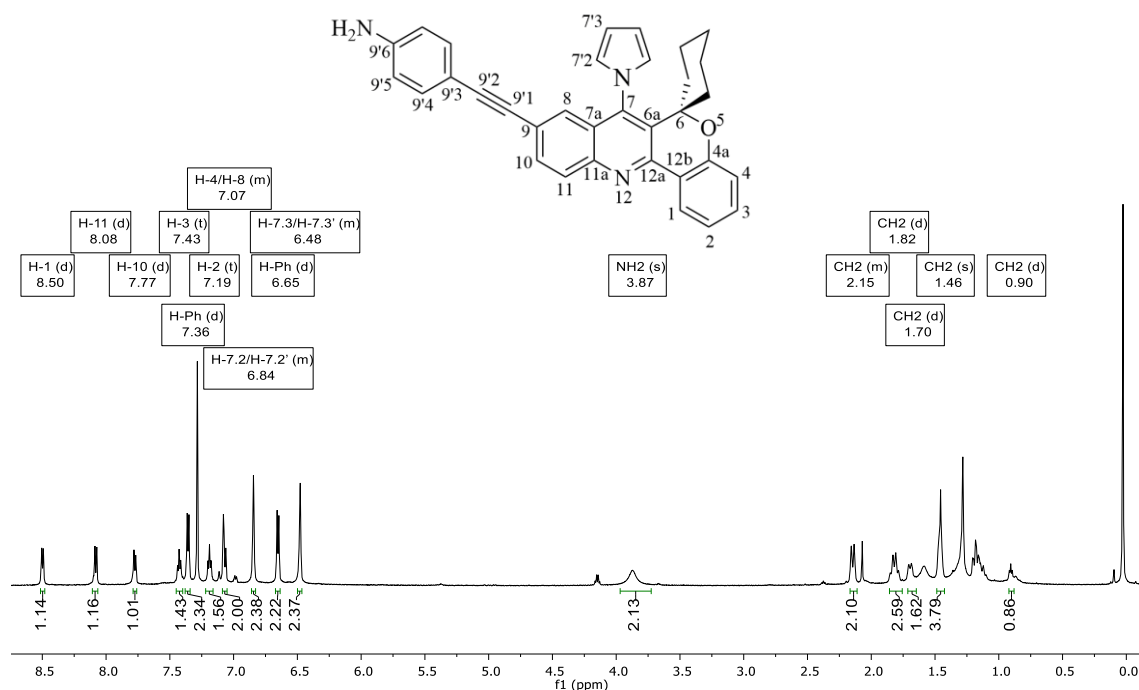

**Figure S30.** <sup>1</sup>H NMR spectra at 600 MHz in CDCl<sub>3</sub> of compound **5**

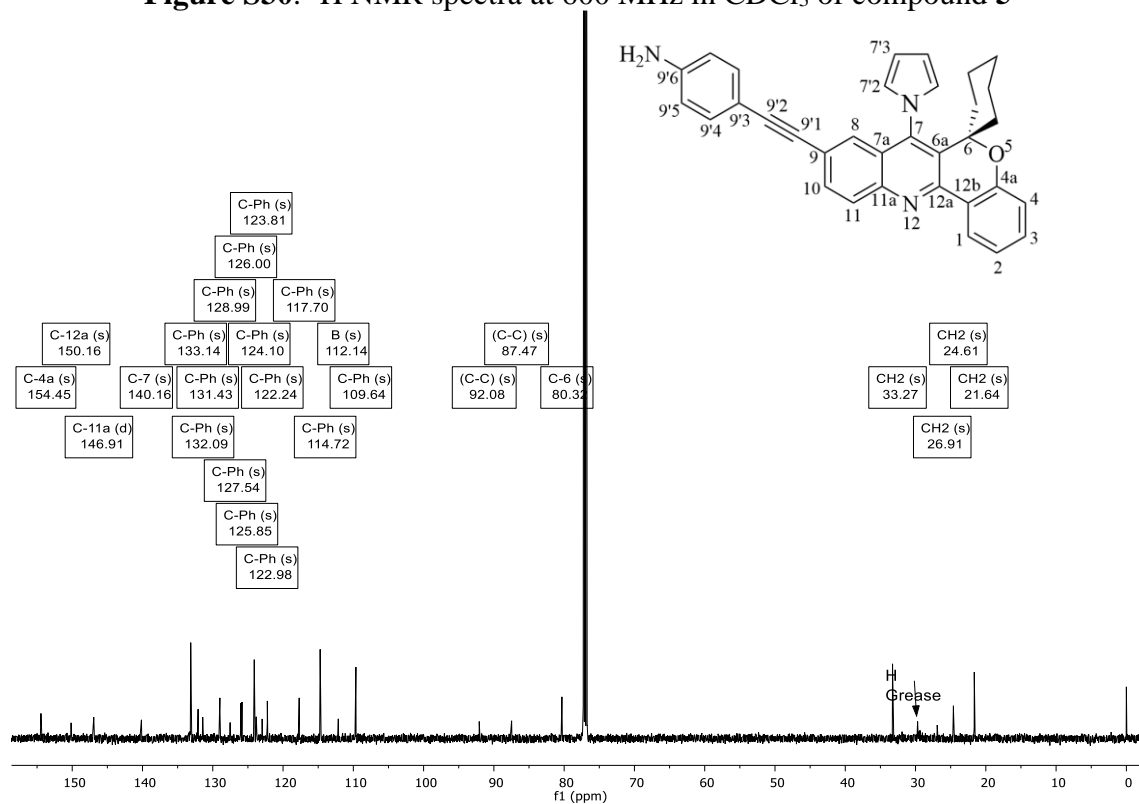

**Figure S31.** <sup>13</sup>C NMR spectra at 150 MHz in CDCl<sub>3</sub> of compound **5**

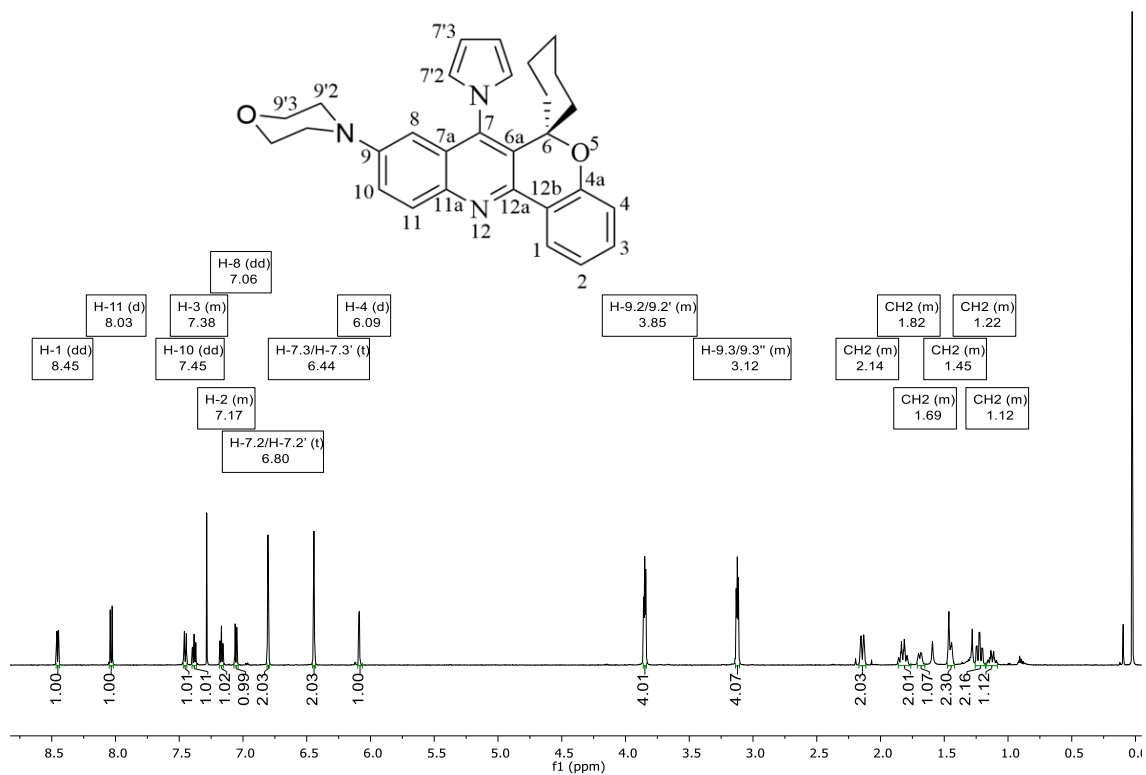

**Figure S32.** <sup>1</sup>H NMR spectra at 600 MHz in CDCl<sub>3</sub> of compound **6**

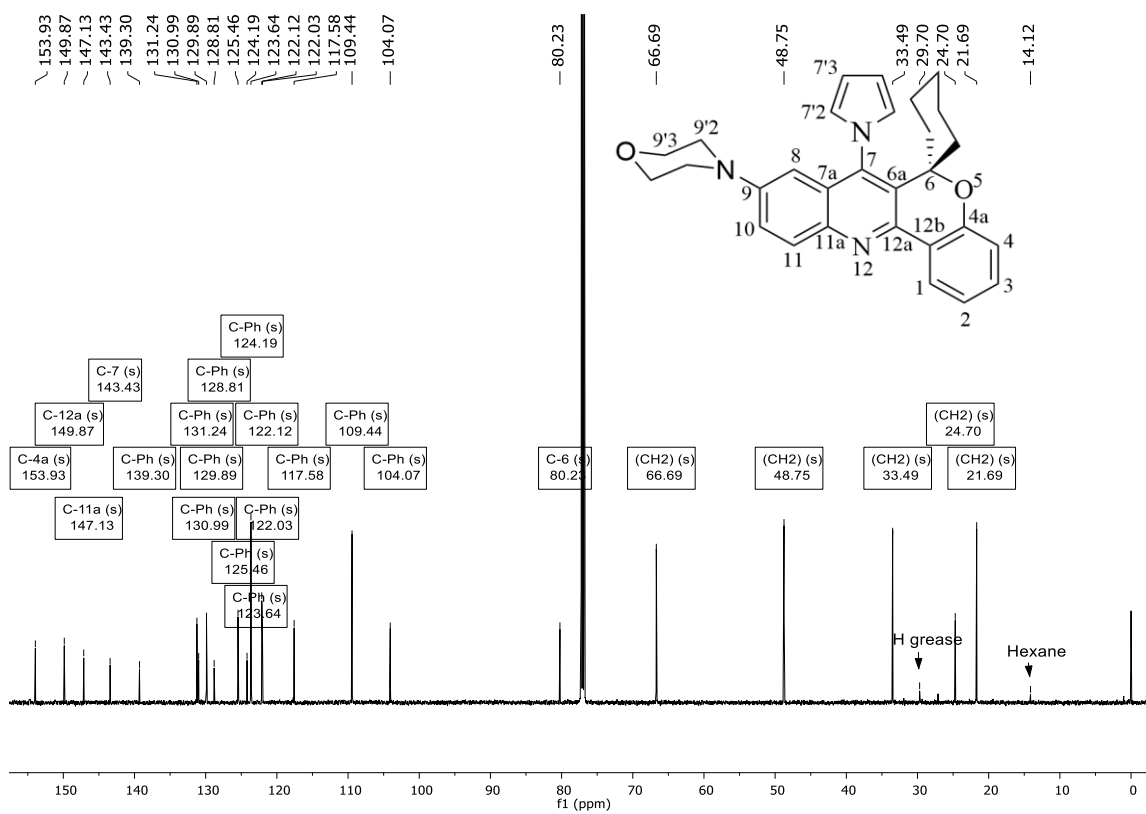

**Figure S33.** <sup>13</sup>C NMR spectra at 150 MHz in CDCl<sub>3</sub> of compound **6**

### 3. UV-Vis analysis

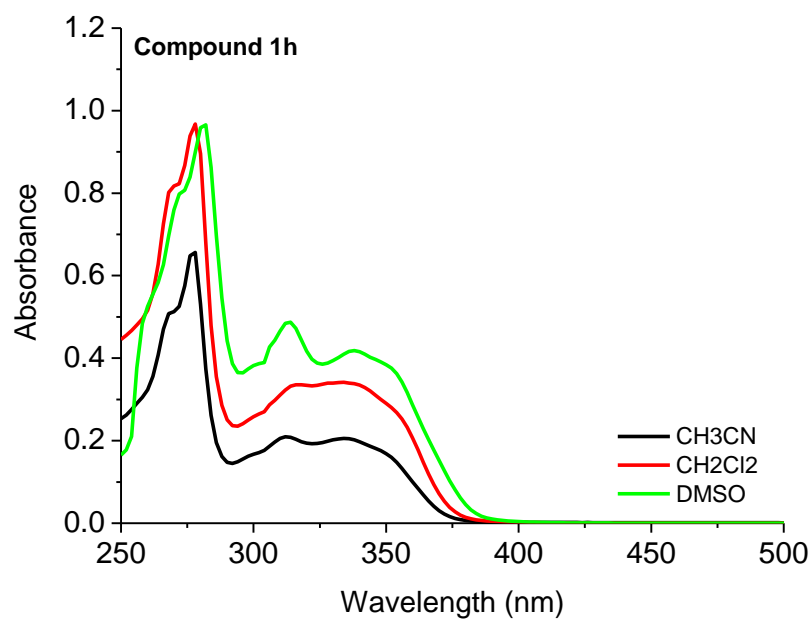

**Figure S34.** UV-Vis ( $[ ] = 10^{-5}$  M range) spectra of derivative **1h**.

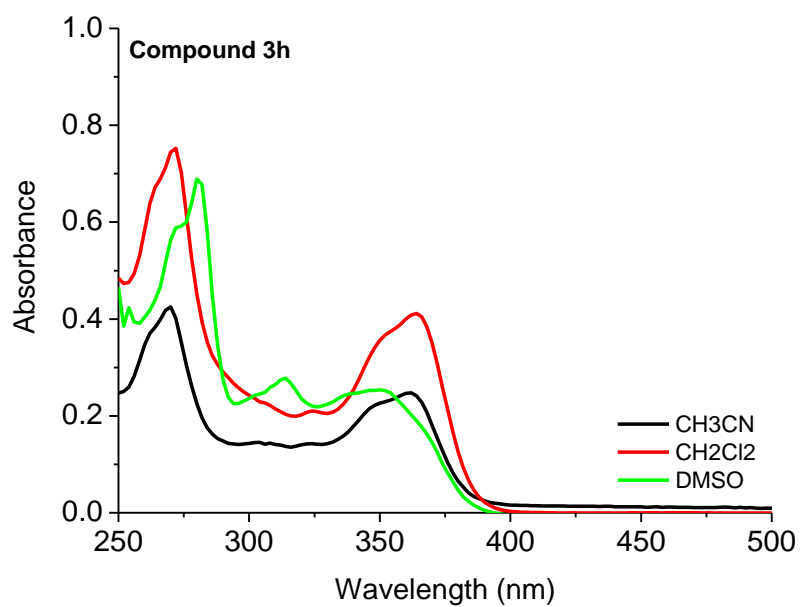

**Figure S35.** UV-Vis ( $[ ] = 10^{-5}$  M range) spectra of derivative **3h**.

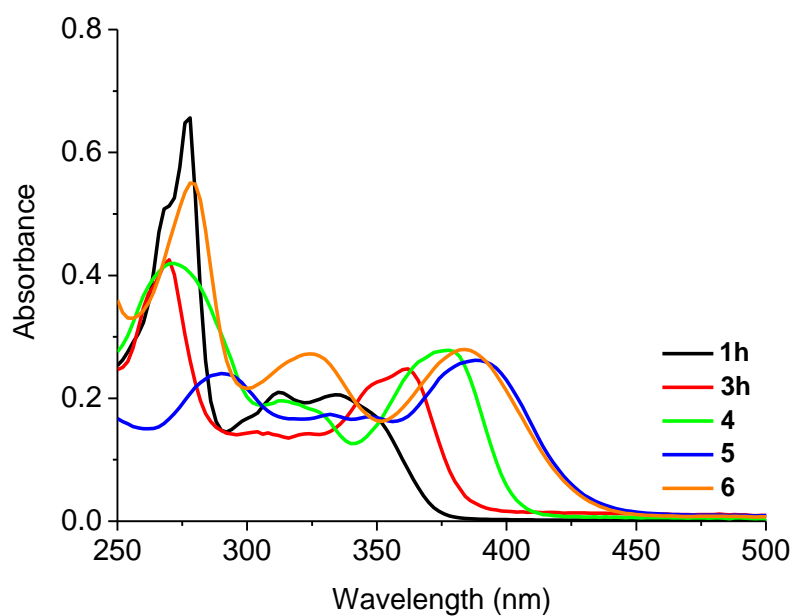

**Figure S36.** UV-Vis ( $[ ] = 10^{-5}$  M range) spectra of derivatives **4**, **5**, and **6** in CH<sub>3</sub>CN solution, respectively.

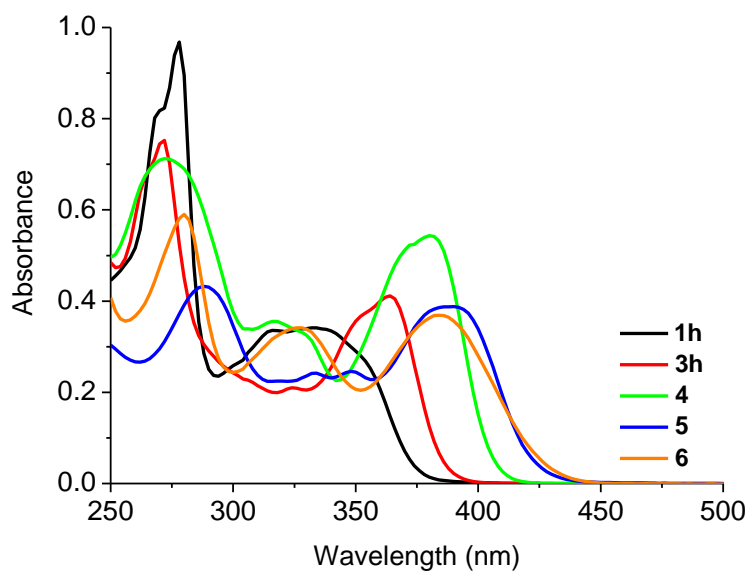

**Figure S37.** UV-Vis ( $[ ] = 10^{-5}$  M range) spectra of derivatives **4**, **5**, and **6** in CH<sub>2</sub>Cl<sub>2</sub> solution, respectively.

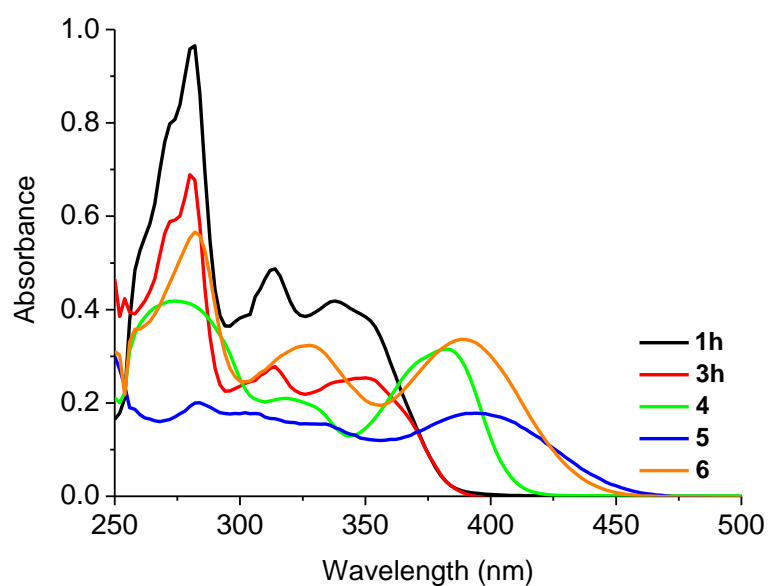

**Figure S38.** UV-Vis ( $[ ] = 10^{-5}$  M range) spectra of derivatives **4**, **5**, and **6** in DMSO solution, respectively.

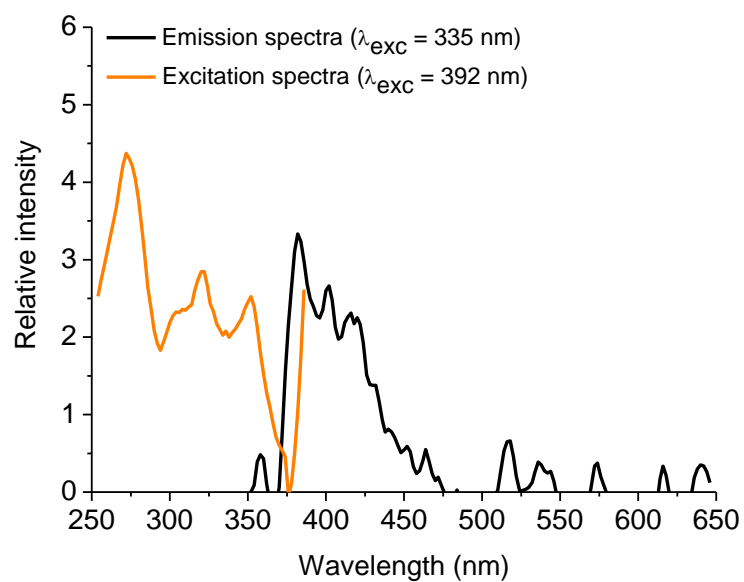

**Figure S39.** Steady-state emission and excitation spectra ( $[ ] = 10^{-6}$  M range) of derivative **1h** in  $\text{CH}_3\text{CN}$  solution.

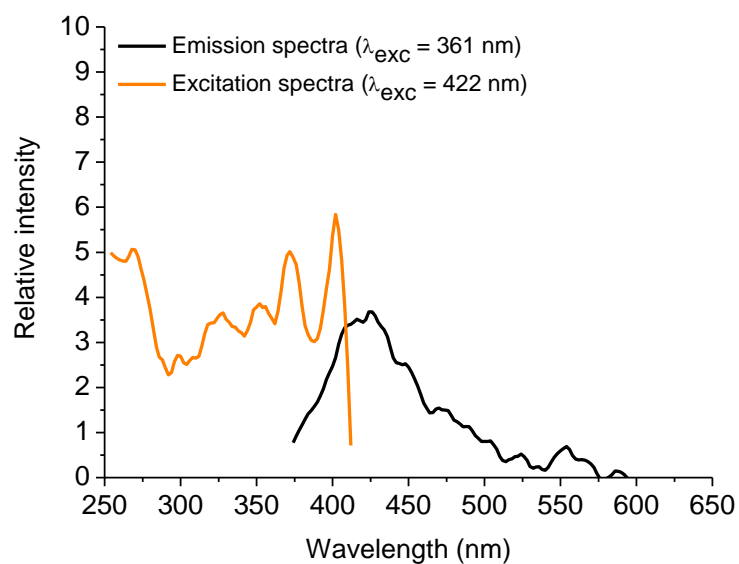

**Figure S40.** Steady-state emission and excitation spectra ( $[ ] = 10^{-6}$  M range) of derivative **3h** in  $\text{CH}_3\text{CN}$  solution.

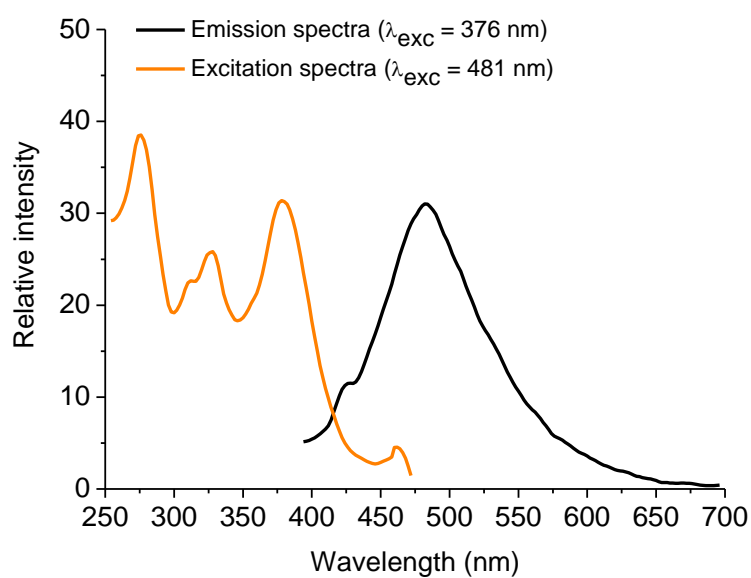

**Figure S41.** Steady-state emission and excitation spectra ( $[ ] = 10^{-6}$  M range) of derivative **4** in  $\text{CH}_3\text{CN}$  solution.

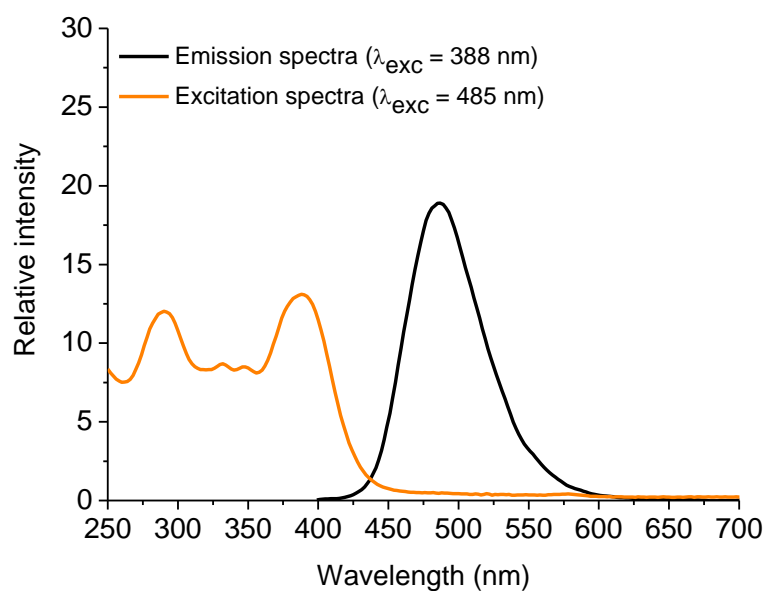

**Figure S42.** Steady-state emission and excitation spectra ( $[ ] = 10^{-6} \text{ M}$  range) of derivative **5** in CH<sub>3</sub>CN solution.

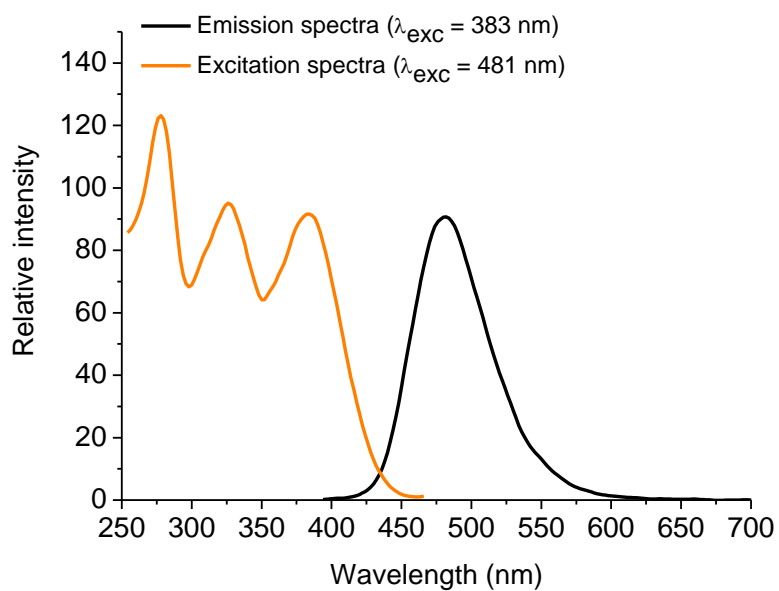

**Figure S43.** Steady-state emission and excitation spectra ( $[ ] = 10^{-6} \text{ M}$  range) of derivative **6** in CH<sub>3</sub>CN solution.

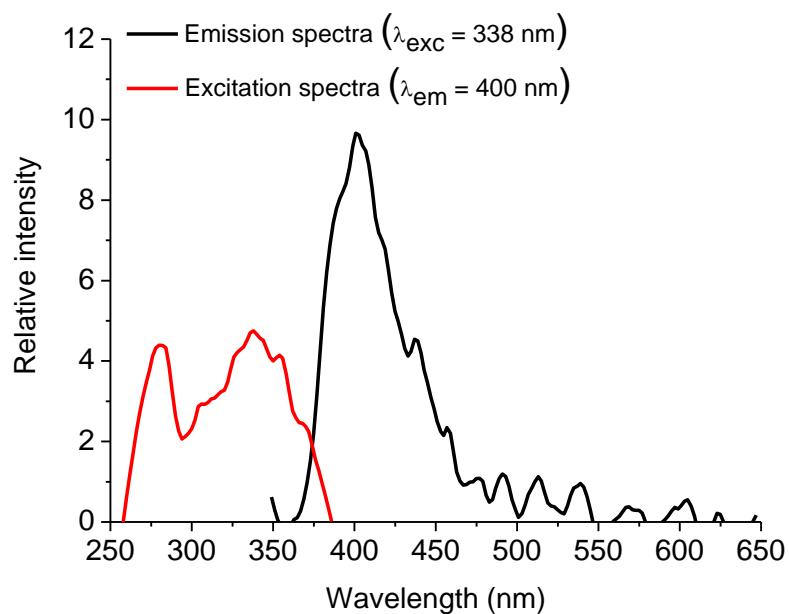

**Figure S44.** Steady-state emission and excitation spectra ( $[ ] = 10^{-6} \text{ M}$  range) of derivative **1h** in DMSO solution.

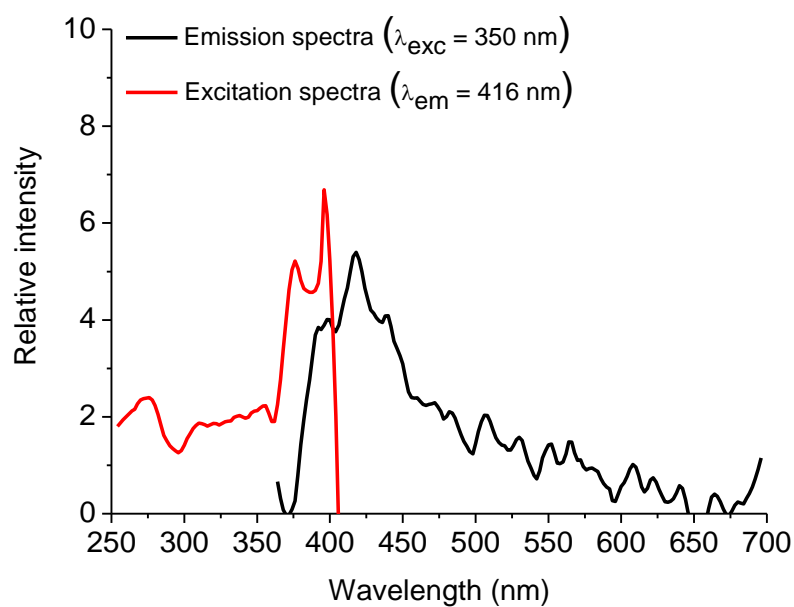

**Figure S45.** Steady-state emission and excitation spectra ( $[ ] = 10^{-6} \text{ M}$  range) of derivative **3h** in DMSO solution.

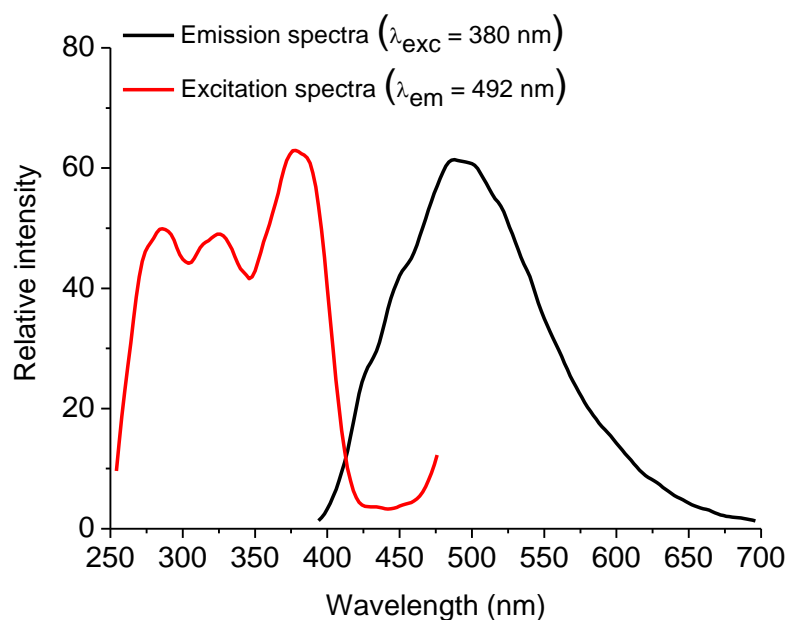

**Figure S46.** Steady-state emission and excitation spectra ( $[ ] = 10^{-6}$  M range) of derivative **4** in DMSO solution.

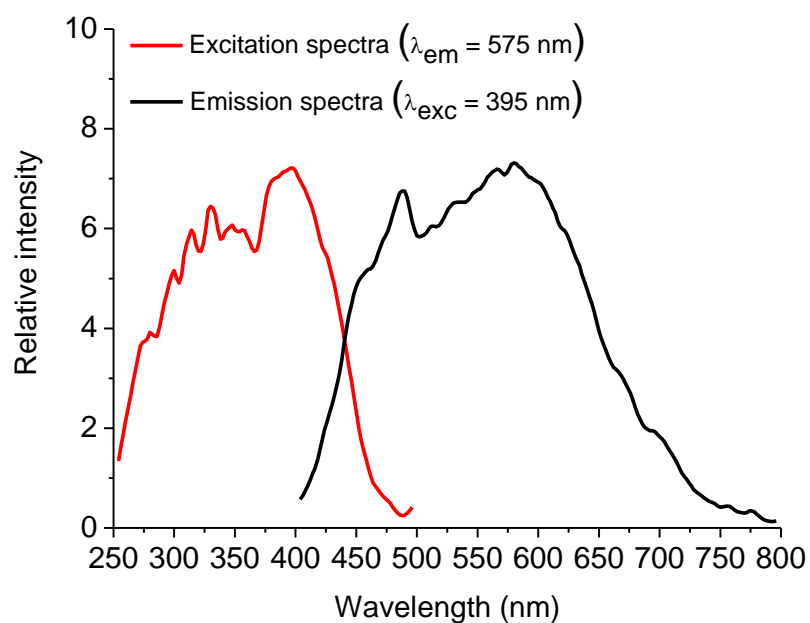

**Figure S47.** Steady-state emission and excitation spectra ( $[ ] = 10^{-6}$  M range) of derivative **5** in DMSO solution.

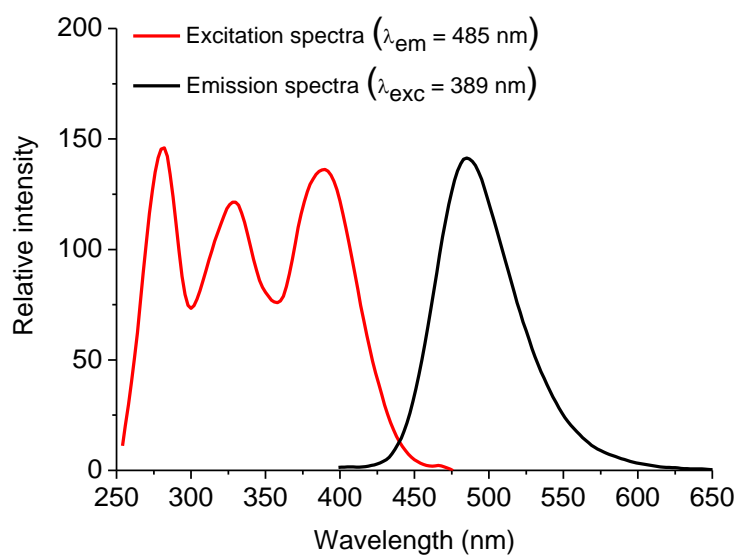

**Figure S48.** Steady-state emission and excitation spectra ( $[ ] = 10^{-6}$  M range) of derivative **6** in DMSO solution.

#### 4. References

- (1) Bristow, A. W. T.; Webb, K. S. Intercomparison study on accurate mass measurement of small molecules in mass spectrometry. *J. Am. Soc. Mass Spectrom.* **2003**, *14* (10), 1086–1098. [https://doi.org/10.1016/S1044-0305\(03\)00403-3](https://doi.org/10.1016/S1044-0305(03)00403-3).
